# Supplementary material for: Trends in Use of Medication to Treat Opioid Use Disorder During the COVID-19 Pandemic in 10 State Medicaid Programs
Source: PubMed Central journal article supplement (PMC10276306; doi:10.1001/jamahealthforum.2023.1422), 2023-06-16
Supplement: jamahealthforum-e231422-s001.pdf [file jamahealthforum-e231422-s001.pdf]

## Supplemental Online Content

Austin AE, Tang L, Kim JY, et al. Trends in use of medication to treat opioid use disorder during the COVID-19 pandemic in 10 state Medicaid programs. *JAMA Health Forum*. 2023;4(6):e231422. doi:10.1001/jamahealthforum.2023.1422

**eTable 1.** Study Sample Construction Flowchart

**eMethods 1.** Definition of Medication for Opioid Use Disorder (MOUD)

**eMethods 2.** Definition of Outpatient Visits

**eMethods 3.** State-Specific Definitions of Telehealth

**eMethods 4.** Common Definition of Telehealth From Prior Research

**eFigure 1.** Process for Classifying Medication for Opioid Use Disorder (MOUD) Initiations as In-Person, Telehealth, or Unclassified

**eMethods 5.** Equation for Interrupted Time Series Models

**eTable 2.** Medication for Opioid Use Disorder (MOUD) Outcomes Among Medicaid Enrollees in 10 States

**eFigure 2.** Monthly Percentage of Outpatient Initiations of Medication for Opioid Use Disorder (MOUD) by Modality in 10 States

**eFigure 3.** Monthly Rates of Outpatient Initiation of Medication for Opioid Use Disorder (MOUD) per 100,000 Medicaid Enrollees by Modality in 10 States

**eFigure 4.** Monthly Rates of Outpatient Initiation of Medication for Opioid Use Disorder (MOUD) per 100,000 Medicaid Enrollees With a Common Definition for Telehealth in 10 States

**eFigure 5.** Monthly Rates of Outpatient Initiation of Medication for Opioid Use Disorder (MOUD) per 100,000 Medicaid Enrollees by Type of MOUD in 10 States

**eFigure 6.** Monthly Rates of Any Medication for Opioid Use Disorder (MOUD) per 100,000 Medicaid Enrollees by State

**eFigure 7.** Monthly Rates of Outpatient Initiation of Medication for Opioid Use Disorder (MOUD) per 100,000 Medicaid Enrollees by State

**eFigure 8.** Monthly Mean Proportion of Days Covered With Medication for Opioid Use Disorder (MOUD) in the 90 Days After Initiation Among Medicaid Enrollees by State

**eFigure 9.** Monthly Rates of Any Medication for Opioid Use Disorder (MOUD) per 100,000 Medicaid Enrollees by Age Group

**eFigure 10.** Monthly Rates of Outpatient Initiation of Medication for Opioid Use Disorder (MOUD) per 100,000 Medicaid Enrollees by Age Group

**eFigure 11.** Monthly Rates of Any Medication for Opioid Use Disorder (MOUD) per 100,000 Medicaid Enrollees by Race and Ethnicity

**eFigure 12.** Monthly Rates of Outpatient Initiation of Medication for Opioid Use Disorder (MOUD) per 100,000 Medicaid Enrollees by Race and Ethnicity

**eFigure 13.** Monthly Rates of Any Medication for Opioid Use Disorder (MOUD) per 100,000 Medicaid Enrollees by Sex

**eFigure 14.** Monthly Rates of Outpatient Initiation of Medication for Opioid Use Disorder (MOUD) per 100,000 Medicaid Enrollees by Sex

**eFigure 15.** Monthly Rates of Any Medication for Opioid Use Disorder (MOUD) per 100,000 Medicaid Enrollees by Living Area

**eFigure 16.** Monthly Rates of Outpatient Initiation of Medication for Opioid Use Disorder (MOUD) per 100,000 Medicaid Enrollees by Living Area

**eTable 3.** State-Specific Interrupted Time Series Results for Change in the Likelihood of Any Medication for Opioid Use Disorder (MOUD) After the COVID-19 Public Health

Emergency Was Declared (Post-PHE) Compared With Before the Public Health  
Emergency Was Declared (Pre-PHE) Among Medicaid Enrollees in 10 States

**eTable 4.** State-Specific Interrupted Time Series Results for Change in the Likelihood of  
Outpatient Initiation of Medication for Opioid Use Disorder (MOUD) After the COVID-19  
Public Health Emergency Was Declared (Post-PHE) Compared With Before the Public  
Health Emergency Was Declared (Pre-PHE) Among Medicaid Enrollees in 10 States

**eTable 5.** MODRN Collaborators

This supplemental material has been provided by the authors to give readers additional  
information about their work.

**eTable 1.** Study Sample Construction Flowchart

| <b>Description</b>                                                                                                                                                                    |             |
|---------------------------------------------------------------------------------------------------------------------------------------------------------------------------------------|-------------|
| Number of member-months among non-dual, full benefit Medicaid enrollees between May 2019 - December 2020                                                                              | 345,676,285 |
| Number of member-months excluding enrollees <18 years as of May 1, 2019 or ≥65 years as of December 31, 2020                                                                          | 141,379,843 |
| Number of member-months excluding any monthly observation beyond month of date of death                                                                                               | 141,254,246 |
| Number of member-months excluding enrollees with missing urban/rural classification                                                                                                   | 140,950,666 |
| Number of member-months read in models with the full cohort                                                                                                                           | 140,950,666 |
| Number of member-months used in models with the full cohort                                                                                                                           | 140,950,664 |
| Number of initiations                                                                                                                                                                 | 386,879     |
| In Maine, Opioid Health Homes (OHHs) provide bundled treatment services for opioid use disorder. Medicaid enrollees in Maine who were Opioid Health Home (OHH) members were excluded. |             |

**eMethods1.** Definition of Medication for Opioid Use Disorder (MOUD)

National Drug Code (NDC) in pharmacy claims for any of the following medications (oral and injectable):

Buprenorphine, naltrexone, buprenorphine/naloxone

or

Health Care common Procedure Coding System (HCPCS) code on an outpatient claim for any of the following medications:

Buprenorphine or buprenorphine/naloxone, oral: 'J0571', 'J0572', 'J0573', 'J0574', 'J0575'

Methadone administration: 'H0020'

Naltrexone (extended-release injectable): 'J2315'

Claims for oral medications with negative, missing, or zero days' supply were not included.

## eMethods 2. Definition of Outpatient Visits

Claims with any one of the following outpatient Current Procedural Terminology (CPT) and Health Care Common Procedure Coding System (HCPCS) codes:

00104 , 0901, 0911, 9424, 9426, 9427, 90791, 90792, 90801, 90802, 90804, 90805, 90806, 90807, 90808, 90809, 90810, 90811, 90812, 90813, 90814, 90815, 90820, 90832, 90833, 90834, 90835, 90836, 90837, 90838, 90839, 90840, 90842, 90843, 90844, 90845, 90846, 90847, 90848, 90849, 90853, 90855, 90857, 90862, 90865, 90867, 90868, 90869, 90870, 90871, 90875, 90876, 90880, 90900, 90901, 90902, 90904, 90906, 90908, 90910, 96372, 97003 , 97004, 98960, 98961, 98962, 99058, 99078, 99201, 99202, 99203, 99204, 99205, 99211, 99212, 99213, 99214, 99215, 99241, 99242, 99243, 99244, 99245, 99341, 99342, 99343, 99344, 99345, 99347, 99348, 99349, 99350, 99382, 99383, 99384, 99385, 99386, 99387, 99392, 99393, 99394, 99395, 99396, 99397, 99401, 99402, 99403, 99404, 99404, 99408, 99409, 99411, 99412, 99420, 99490, 99495, 99496, 99510, 0359T, 0360T, 0361T, 0362T, 0363T, 0364T, 0365T, 0366T, 0367T, 0368T, 0369T, 0370T, 0371T, 0372T, 0373T, 0374T, G0071, G0072, G0073, G0074, G0075, G0076, G0077, G0078, G0079, G0080, G0081, G0082, G0155, G0175, G0351, G0396, G0397, G0442, G0443, G0463, G0466, G0467, G0469, G0470, G0505, G0507, G0513, G0514, G0515, G2069, G2074, H0001, H0002, H0004, H0005, H0006, H0007, H0014, H0016, H0020, H0022, H0023, H0028, H0029, H0031, H0033, H0034, H0036, H0037, H0038, H0039, H0040, H0046, H0049, H0050, H1011, H2000, H2001, H2010, H2011, H2013, H2014, H2015, H2016, H2017, H2018, H2019, H2020, H2021, H2022, H2023, H2024, H2025, H2026, H2027, H2028, H2029, H2030, H2031, H2032, H2033, H2037, H5010, H5020, H5025, H5030, H5220, H5230, H5240, H5299, M0064, Q3014, S3005, S9110, S9127, S9454, S9482, S9484, S9485, T1006, T1006, T1007, T1011, T1012, T1015, T1016, T1017, T1018, T1023, T1024, T1025, T1026, T1027, T1040, T1041, T2010, T2011, T2012, T2013, T2014, T2015, T2018, T2019, T2020, T2021, T2022, T2023, T2034, T2036, T2037, Z0001, Z0002, Z0002

or

Claims any one of the following Place of Service (POS) codes:

02, 11, 12, 21, 22, 24, 25, 49, 50, 51, 55, 56, 61, 62, 65, 71, 15, 57, 58, 72

or

Claims with any one of the following HCPCS codes for medication for opioid use disorder:

'J0571', 'J0572', 'J0573', 'J0574', 'J0575', 'H0020', 'J2315'

or

Claims with any one of the state-specific telehealth service codes (see Appendix Exhibit 4)

## eMethods 3. State-Specific Definitions of Telehealth

### Kentucky

- Modifier codes: '95', 'GT', 'GQ'
- Revenue code: '0780'
- POS code: '02'
- CPT/HCPCS codes: 'G2010', 'G2012', '99421', '99422', '99423', '99441', '99442', '99443', 'G2061', 'G2063', '99457', '99458', 'Q3014'
- CPT/HCPCS codes with modifier code 'TG' or 'TF': '97151', '97153', '97155', '97156'
- CPT/HCPCS code 'T1016' with modifier code 'TH' or '95'
- CPT/HCPCS code 'T1017' with modifier code 'U1', 'U2', 'U3', 'U4', 'U5', 'U6'
- CPT/HCPCS code 'H0043' with modifier code 'U8'

### Maine

- Modifier codes: '95', 'GT'
- POS code: '02'
- CPT/HCPCS codes: '99446', '99447', '99448', '99449', '99451', '99452', '0188T', '0189T', 'G0181', 'G0182', 'G0406', 'G0407', 'G0408', 'G0425', 'G0426', 'G0427', 'Q3014', 'T1014', 'S9110', 'G2010', 'G2012', 'G2061', 'G2062', 'G2063', 'G0071', '98966', '98967', '98968', '99421', '99422', '99423', '99441', '99442', '99443'

### Maryland

For March 5, 2020-July 1, 2021”

- Modifier code: 'UB'

No time restriction:

- CPT/HCPCS code: 'Q3014'
- Modifier code: 'GT'

### Michigan

No time restriction:

- CPT/HCPCS codes with modifier code '95' or 'GT' or POS code '02': '90785', '90791', '90792', '90832', '90833', '90834', '90836', '90837', '90838', '90839', '90840', '90846', '90847', '90849', '90853', '90863', '90887', '92507', '92508', '92521', '92522', '92523', '92524', '92626', '92627', '92630', '92633', '96103', '96105', '96110', '96112', '96113', '96116', '96120', '96121', '96127', '96130', '96131', '96132', '96133', '96136', '96137', '96138', '96139', '96146', '97110', '97112', '97116', '97161', '97162', '97163', '97164', '97165', '97166', '97167', '97168', '97530', '97535', '97760', '97761', '97763', '97802', '97803', '97804', '99201', '99202', '99203', '99204', '99205', '99211', '99212', '99213', '99214', '99215', '99221', '99222', '99223', '99224', '99225', '99226', '99231', '99232', '99233', '99307', '99308', '99309', '99310', '99324', '99325', '99326', '99327', '99328', '99334', '99335', '99336', '99337', '99341', '99342', '99343', '99344', '99345', '99347', '99348', '99349', '99350', '99605', 'G0176', 'G0177', 'G0409', 'G2067', 'G2068', 'G2073', 'G2074', 'G2076', 'G2077', 'G2080', 'H0001', 'H0002', 'H0004', 'H0005', 'H0015', 'H0022', 'H0023', 'H0025', 'H0031', 'H0032', 'H0034', 'H0036', 'H0038', 'H0039', 'H0043', 'H0046', 'H0050', 'H2010', 'H2011', 'H2014', 'H2015', 'H2019', 'H2021', 'H2022', 'H2023', 'H2027', 'H2030', 'H2033', 'S5110', 'S5111', 'S5116', 'S5140', 'S5145', 'S9445', 'S9446', 'S9470', 'S9482', 'S9484', 'T1001', 'T1002', 'T1012', 'T1015', 'T1016', 'T1017', 'T1023', 'T2015', 'T2023', 'T5999', '90951', '90952', '90954', '90955', '90957', '90958', '90960', '90961', '90963', '90964', '90965', '90966', '90967', '90968', '90969',

'90970', '92227', '92228', '96156', '96158', '96159', '96160', '96161', '96164', '96165', '96167', '96168', '99241', '99242', '99243', '99244', '99245', '99251', '99252', '99253', '99254', '99255', '99354', '99355', '99356', '99357', '99406', '99407', '99408', '99409', '99483', '99495', '99496', '99497', '99498', 'G0108', 'G0109', 'G0406', 'G0407', 'G0408', 'G0420', 'G0421', 'G0425', 'G0426', 'G0427', 'G0459', 'G0508', 'G0509', 'G2086', 'G2087', 'G2088', 'G2212', 'Q3014'

- Revenue codes with modifier code '95' or 'GT' or POS code '02': '0900', '0906', '0912', '0913', '0914', '0915', '0916', '0919'
- CPT/HCPCS codes with modifier code 'HF' AND (modifier code '95' or 'GT' or POS code '02'): '99241', '99242', '99243', '99244', '99245', '99251', '99252', '99253', '99254', '99255', 'H2035', 'H2036', 'T1007'
- CPT/HCPCS code 'H2000' with modifier code 'TS' AND (modifier code '95' or 'GT' or POS '02')
- CPT/HCPCS codes with modifier code 'U5' AND (modifier code '95' or 'GT' or POS '02'): '97151', '97153', '97154', '97155', '97156', '97157', '97158', '0362T'

On or after January 1, 2021:

- CPT/HCPCS codes with modifier code '95' or 'GT' or POS code '02': '99354', '99355', '99415', '99416', '99417'

## North Carolina

Before January 1, 2020:

- CPT/HCPCS codes with modifier code 'GT': '99201', '99202', '99203', '99204', '99205', '99211', '99212', '99213', '99214', '99215', '99241', '99242', '99243', '99244', '99245', '99251', '99252', '99253', '99254', '99255', '99347', '99348', '99349', '99350', '99421', '99422', '99423', '99441', '99442', '99443', 'G2012', '99446', '99447', '99448', '99449', '99473', '99474', '99453', '99454', '99457', '99458'

On or after January 1, 2020:

- CPT/HCPCS codes with modifier code 'GT' and 'CR': '99201', '99202', '99203', '99204', '99205', '99211', '99212', '99213', '99214', '99215', '99241', '99242', '99243', '99244', '99245', '99251', '99252', '99253', '99254', '99255', '99347', '99348', '99349', '99350', '59400', '59410', '59425', '59426', '59430', '59510', '59515', '90832', '90834', '90837', '90846', '90847', '90951', '90952', '90953', '90954', '90955', '90956', '90957', '90958', '90959', '90960', '90961', '90962', '90963', '90964', '90965', '90966', '90967', '90968', '90969', '90970', '90989', '90993', '92065', '92507', '92521', '92522', '92523', '92524', '92526', '92607', '92608', '92609', '92630', '92633', '94010', '94060', '94150', '94375', '94664', '94760', '95992', '96110', '96112', '96113', '96116', '96121', '96125', '96130', '96131', '96132', '96133', '96136', '96137', '96138', '96139', '96146', '96156', '96158', '96159', '97110', '97112', '97116', '97151', '97152', '97153', '97154', '97155', '97161', '97162', '97163', '97164', '97165', '97166', '97167', '97168', '97530', '97533', '97535', '97542', '97750', '97763', '97802', '97803', '99201', '99202', '99203', '99204', '99205', '99211', '99212', '99213', '99214', '99215', '99231', '99232', '99233', '99238', '99239', '99241', '99242', '99243', '99244', '99245', '99307', '99308', '99309', '99310', '99406', '99407', '99503', '99504', 'H0031', 'H0036', 'T1017', 'T1023', 'G0108', 'H0038', 'H0040', 'H2011', 'H2022', 'H2033', 'Q3014', 'T1023'
- CPT/HCPCS codes with modifier code 'CR': '99421', '99422', '99423', '99441', '99442', '99443', 'G2012', '99446', '99447', '99448', '99449', '99473', '99474', '99453', '99454', '99457', '99458', '90785', '90791', '90792', '90832', '90833', '90834', '90836', '90837', '90838', '90839', '90840', '90846', '90847', '90849', '90853', '96127', '97156', '97157', '98966', '98967', '98968', 'G2012', 'H0010', 'H0012', 'H0013', 'H0015', 'H0019', 'H0035', 'H0038', 'H0040', 'H2011', 'H2017', 'H2020', 'H2022', 'H2033', 'H2035', 'H2036', 'RC0911', 'RC0183', 'S9484', 'T2013'

- CPT/HCPCS codes with modifier code ‘GT’ and ‘CR’ and POS ‘12’: '99501', '99502'
- CPT/HCPCS code ‘S9442’ with modifier code ‘GT’ and ‘CR’ and POS code ‘71’
- CPT/HCPCS codes with POS code ‘02’: 'D0140', 'D0170', 'D0999'
- CPT/HCPCS code ‘T2015’ with modifier code ‘GT’ and ‘CR’ and ‘HI’ and (POS code ‘50’ or ‘72’)
- CPT/HCPCS code ‘96161’ with modifier code ‘CR’ and ‘EP’
- CPT/HCPCS codes with modifier code ‘CR’ and ‘HA’: 'H2012', 'S9484'
- CPT/HCPCS code ‘H0028’ with modifier code ‘CR’ and ‘HQ’
- CPT/HCPCS code ‘H2015’ with modifier code ‘CR’ and ‘HT’ with modifier code: 'GT', 'HO', 'HF', 'HN', 'UI', 'HM'
- CPT/HCPCS code ‘H0036’ with modifier code ‘GT’ and ‘CR’ with modifier code: 'HI', 'HM', 'HQ', 'TL', 'UI'
- CPT/HCPCS codes with modifier code ‘GT’ or ‘CR’ or ‘FP’: '99201', '99202', '99203', '99204', '99205', '99211', '99213', '99214', '99215', '99241', '99242', '99243', '99244', '99441', '99442', '99443'
- CPT/HCPCS code 'S0280' or 'S0281'

#### No time restriction

- CPT/HCPCS codes 'T1015' with modifier code ‘GT’ and ‘CR’ and (POS code ‘50’ or ‘72')
- CPT/HCPCS codes 'G0071' with modifier code ‘CR’ and (POS code ‘50’ or ‘72')

#### Ohio

- Modifier codes: ‘95’, ‘GT’, ‘GQ’
- CPT/HCPCS codes: '99441', '99442', '99421', '99422', '99423', '99457', '99458'

#### Pennsylvania

- Modifier codes: ‘95’, ‘GT’, ‘CR’, ‘DR’
- POS code: ‘02’
- CPT/HCPCS codes: 'D9995' or 'Q3014'

#### Virginia

- CPT/HCPCS codes with modifier code ‘GT’: 'Q3014', '90833', '90834', '90836', '90837', '90838', '90846', '90847', '90853', '90863', '90791', '90792', '90785', '90832', 'T1012', 'S9445'

#### West Virginia

- Modifier codes: ‘GT’, ‘GY’
- Revenue code: ‘0780’, ‘0789’
- POS code: ‘02’
- CPT/HCPCS codes: 'D9995', '99444', '99421', '99422', '99423', 'G2061', 'G2062', 'G2063', 'G2010', 'G2012', 'Q3014', '98966', '98967', '98968', '99441', '99442', '99443'
- CPT/HCPCS codes with modifier code ‘95’ or ‘GT’: '77427', '90785', '90791', '90792', '90832', '90833', '90834', '90836', '90837', '90838', '90839', '90840', '90845', '90846', '90847', '90853', '90875', '90951', '90952', '90953', '90954', '90955', '90956', '90957', '90958', '90959', '90960', '90961', '90962', '90963', '90964', '90965', '90966', '90967', '90968', '90969', '90970', '92002', '92004', '92012', '92014', '92507', '92508', '92521', '92522', '92523', '92524', '92601', '92602', '92603', '92604', '93797', '93798', '93750', '94002', '94003', '94004', '94005', '94664', '95970', '95971', '95972', '95983', '95984', '96110', '96112', '96113', '96116', '96121', '96127', '96130', '96131', '96132', '96133', '96136', '96137', '96138', '96139', '96156', '96158', '96159', '96160', '96161', '96164', '96165', '96167', '96168', '96168', '96170', '96171', '97110', '97112', '97116', '97150', '97151', '97152', '97153', '97154', '97155', '97156', '97157', '97158', '97161', '97162',



'97163', '97164', '97165', '97166', '97167', '97168', '97530', '97535', '97542', '97750', '97755', '97760', '97761', '97802', '97803', '97804', '99202', '99203', '99204', '99205', '99211', '99212', '99213', '99214', '99215', '99217', '99218', '99219', '99220', '99221', '99222', '99223', '99224', '99225', '99226', '99231', '99232', '99233', '99234', '99235', '99236', '99238', '99239', '99281', '99282', '99283', '99284', '99285', '99291', '99292', '99304', '99305', '99306', '99307', '99308', '99309', '99310', '99315', '99316', '99324', '99325', '99326', '99327', '99328', '99334', '99335', '99336', '99337', '99341', '99342', '99343', '99344', '99345', '99347', '99348', '99349', '99350', '99354', '99355', '99356', '99357', '99406', '99407', '99441', '99442', '99443', '99468', '99469', '99471', '99472', '99473', '99475', '99476', '99477', '99478', '99479', '99480', '99483', '99495', '99496', '99497', '99498', '0373T', 'S9152', '0362T', 'G0108', 'G0109', 'G0270', 'G0296', 'G0396', 'G0397', 'G0406', 'G0407', 'G0408', 'G0410', 'G0420', 'G0421', 'G0422', 'G0423', 'G0424', 'G0425', 'G0426', 'G0427', 'G0438', 'G0439', 'G0442', 'G0443', 'G0444', 'G0445', 'G0446', 'G0447', 'G0459', 'G0506', 'G0508', 'G0509', 'G0513', 'G0514', 'G2086', 'G2087', 'G2088', 'G9685', 'G2211', 'G2212'

## Wisconsin

Before September 1, 2020:

- CPT/HCPCS code '99201' with modifier code: '95' or 'GT' or POS code '02'

On or after March 1, 2020:

- Modifier code '95' or 'GT' or POS '02'
- CPT/HCPCS codes with modifier code 'U8': 'H0043', 'H0038'
- CPT/HCPCS codes with modifier code 'TG' or 'TF': '97151', '97153', '97155', '97156'

No time restriction

- CPT/HCPCS codes with modifier code '95' or 'GT' or POS code '02': 'H2012', '92550', '92585', '92586', '92587', '92588', 'H0039', 'H2017', 'S9484', '90951', '90952', '90954', '90955', '90956', '90957', '90958', '90960', '90961', '90967', '90968', '90969', '90970', '96156', '96158', '96159', '96167', '96170', '96171', '99251', '99252', '99253', '99254', '99255', '99202', '99203', '99204', '99205', '99211', '99212', '99213', '99214', '99215', '99241', '99242', '99243', '99244', '99245', '90785', '90791', '90792', '90832', '90833', '90834', '90836', '90837', '90838', '90839', '90840', '90845', '90846', '90847', '90849', '90875', '90876', '90887', 'H0022', 'H0047', 'T1006'

#### eMethods 4. Common Definition of Telehealth From Prior Research<sup>1</sup>

- POS code: '02'

or

- Modifier code: 'GT', 'GQ', '95', 'G0'

or

- HCPCS codes:
  - 'G0425-7' (telehealth consultations emergency department or initial inpatient)
  - 'G2025' (when a FQHC / Rural health clinic provides telemedicine services)
  - 'G0406-8' (follow-up inpatient or skilled nursing facility consultations via telehealth)
  - 'G0459' (pharmacologic management service furnished via telehealth to inpatients)
  - 'G0508-9' (telehealth consultations for critical care)
  - '0188T' (remote real-time interactive video conferenced critical care, first 30- 74 minutes)
  - '99441'-'99443'
  - 'G2012', 'G2010', '99421'-'99423', 'G2061-3', 'G0071', 'G2250-2', '98970-2'  
Note: 'G2250-2', '98970-2' are new codes FY2021 that replace 'G2010'/'G2012', 'G2061-3'
  - '99446'-'99452'
  - '98966'-'98968'
  - '99453', '99454', '99457', '9909'1, '95250', '95251'

Excluding HCPCS code 'Q3014' even if accompanied by one of the above POS or modifier codes

<sup>1</sup>Barsky BA, Busch AB, Patel SY, Mehrotra A, Huskamp HA. Use of Telemedicine for Buprenorphine Inductions in Patients With Commercial Insurance or Medicare Advantage. *JAMA Network Open*. 2022;5(1).

**eFigure 1.** Process for Classifying Medication for Opioid Use Disorder (MOUD) Initiations as In-Person, Telehealth, or Unclassified

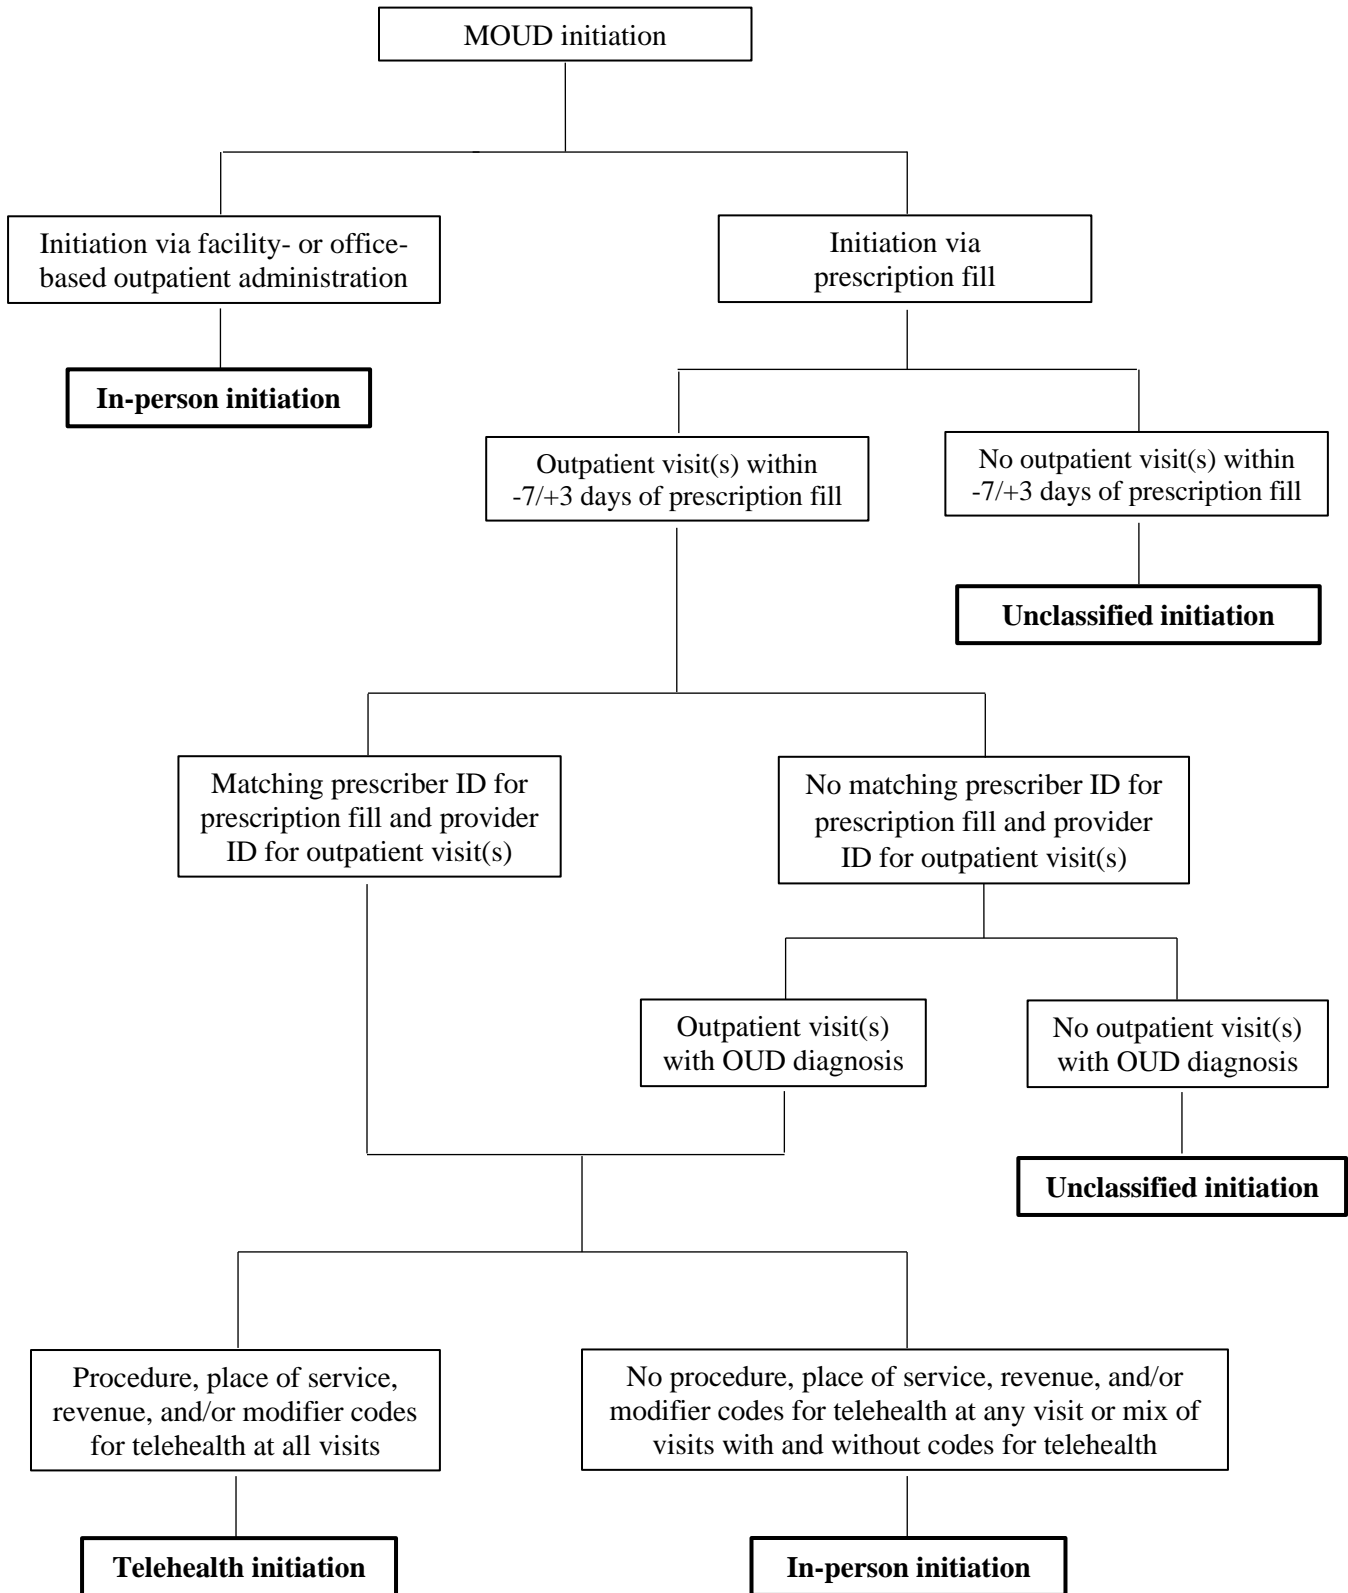

## eMethods 5. Equation for Interrupted Time Series Models

To assess changes in any MOUD and outpatient initiation of MOUD in the post-PHE period relative to the pre-PHE period, we conducted interrupted time series (ITS) analyses at the enrollee-level, specifying mean models as follows:

$$g(E[Y_{it}]) = \beta_0 + \beta_1(\text{time})_t + \beta_2(\text{PHE})_t + \beta_3(\text{Post-PHE time})_t + X_i\theta + P_{it}\sigma$$

where  $Y_{it}$  is a binary indicator for the outcome for enrollee  $i$  in month-year  $t$  and  $g$  is the logit link function defined as  $g(p) = \ln\left(\frac{p}{1-p}\right)$ .  $\text{Time}$  is an integer variable indicating month from the start to the end of the study period.  $\text{PHE}$  is a binary variable equal to 1 in the post-PHE period (March 2020-December 2020).  $\text{Post-PHE time}$  is an integer variable indicating month from the start of the post-PHE period, where March 2020 is month 1.  $\beta_2$  captures the immediate change in the outcome in the post-PHE period.  $\beta_3$  captures the change in the trend in the outcome in the post-PHE period relative to the pre-PHE period.  $X$  is a vector of time-invariant enrollee characteristics,  $P$  is a vector of time-varying enrollee characteristics. We used generalized estimation equations with logit link to calculate odds ratios (ORs) and the robust covariance matrix estimator (i.e., sandwich estimator) to calculate the 95% confidence intervals (CIs), accounting for repeated measures within enrollees over time, specifying a first-order autoregressive correlation matrix.

**eTable 2.** Medication for Opioid Use Disorder (MOUD) Outcomes Among Medicaid Enrollees in 10 States<sup>a</sup>

| Year and month | Rate of any MOUD per 100,000 enrollees |               |           |            | Rate of outpatient MOUD initiation <sup>b</sup> per 100,000 enrollees |                       |                        |                          | Mean proportion of days covered with MOUD in the 90 days after initiation |               |           |            |
|----------------|----------------------------------------|---------------|-----------|------------|-----------------------------------------------------------------------|-----------------------|------------------------|--------------------------|---------------------------------------------------------------------------|---------------|-----------|------------|
|                | All MOUD types                         | Buprenorphine | Methadone | Naltrexone | All initiations                                                       | In-person initiations | Telehealth initiations | Unclassified initiations | All MOUD types                                                            | Buprenorphine | Methadone | Naltrexone |
| 2019-05        | 2,966.2                                | 1,933.5       | 910.7     | 143.8      | 281.1                                                                 | 228.9                 | 0.9                    | 51.3                     | 59.9                                                                      | 62.9          | 44.7      | 60.1       |
| 2019-06        | 2,980.5                                | 1,943.3       | 924.9     | 134.4      | 269.2                                                                 | 220.4                 | 0.5                    | 48.3                     | 60.3                                                                      | 62.1          | 47.1      | 61.8       |
| 2019-07        | 3,058.7                                | 1,986.0       | 950.5     | 145.4      | 299.9                                                                 | 245.1                 | 0.7                    | 54.1                     | 58.2                                                                      | 62.5          | 47.4      | 62.9       |
| 2019-08        | 3,098.3                                | 2,015.7       | 960.2     | 146.8      | 294.1                                                                 | 239.2                 | 0.8                    | 54.2                     | 59.3                                                                      | 62.5          | 48.0      | 61.4       |
| 2019-09        | 3,113.6                                | 2,020.4       | 973.5     | 142.5      | 278.1                                                                 | 227.2                 | 0.8                    | 50.1                     | 59.4                                                                      | 61.9          | 51.4      | 62.8       |
| 2019-10        | 3,182.6                                | 2,073.3       | 981.5     | 152.9      | 303.7                                                                 | 250.0                 | 0.8                    | 52.9                     | 60.8                                                                      | 62.7          | 52.6      | 62.6       |
| 2019-11        | 3,175.0                                | 2,065.3       | 989.3     | 143.0      | 274.5                                                                 | 224.4                 | 0.6                    | 49.5                     | 59.5                                                                      | 62.9          | 50.2      | 62.5       |
| 2019-12        | 3,218.8                                | 2,098.2       | 1,002.8   | 142.4      | 284.2                                                                 | 231.5                 | 0.8                    | 51.9                     | 59.6                                                                      | 63.4          | 51.9      | 64.1       |
| 2020-01        | 3,260.1                                | 2,125.0       | 1,013.3   | 150.0      | 336.7                                                                 | 276.1                 | 1.3                    | 59.4                     | 60.3                                                                      | 63.8          | 53.4      | 63.0       |
| 2020-02        | 3,261.2                                | 2,122.9       | 1,023.9   | 140.5      | 282.2                                                                 | 230.3                 | 1.4                    | 50.6                     | 62.2                                                                      | 64.7          | 56.3      | 63.4       |
| 2020-03        | 3,312.0                                | 2,155.2       | 1,039.5   | 143.2      | 288.0                                                                 | 231.3                 | 5.6                    | 51.1                     | 64.5                                                                      | 67.5          | 60.0      | 63.2       |
| 2020-04        | 3,239.2                                | 2,127.5       | 1,008.0   | 127.7      | 237.7                                                                 | 171.8                 | 21.1                   | 44.7                     | 63.2                                                                      | 66.1          | 54.4      | 64.8       |
| 2020-05        | 3,211.8                                | 2,116.4       | 1,001.7   | 118.8      | 233.1                                                                 | 172.4                 | 17.9                   | 42.9                     | 60.6                                                                      | 63.7          | 54.5      | 63.5       |
| 2020-06        | 3,252.7                                | 2,147.1       | 1,010.6   | 121.8      | 285.2                                                                 | 224.2                 | 17.1                   | 43.9                     | 60.1                                                                      | 64.0          | 50.8      | 62.9       |
| 2020-07        | 3,238.1                                | 2,137.4       | 1,007.9   | 119.6      | 269.7                                                                 | 209.5                 | 15.6                   | 44.6                     | 57.3                                                                      | 60.7          | 47.9      | 62.7       |
| 2020-08        | 3,225.2                                | 2,121.3       | 1,012.2   | 118.3      | 275.6                                                                 | 216.2                 | 16.1                   | 43.2                     | 57.3                                                                      | 60.7          | 50.4      | 64.3       |
| 2020-09        | 3,227.1                                | 2,122.9       | 1,011.0   | 119.1      | 264.7                                                                 | 207.5                 | 15.0                   | 42.2                     | 59.5                                                                      | 62.0          | 51.7      | 63.0       |
| 2020-10        | 3,240.1                                | 2,135.5       | 1,013.2   | 118.7      | 270.0                                                                 | 211.2                 | 14.4                   | 44.4                     |                                                                           |               |           |            |
| 2020-11        | 3,192.0                                | 2,101.4       | 1,003.6   | 111.8      | 234.5                                                                 | 182.9                 | 13.7                   | 37.9                     |                                                                           |               |           |            |
| 2020-12        | 3,192.3                                | 2,118.8       | 985.2     | 112.4      | 243.8                                                                 | 187.8                 | 16.4                   | 39.7                     |                                                                           |               |           |            |

<sup>a</sup>Non-dual full benefit Medicaid enrollees ages 18-64 years in Kentucky, Maine, Maryland, Michigan, North Carolina, Ohio, Pennsylvania, Virginia, West Virginia, Wisconsin

<sup>b</sup>Initiation defined as a new MOUD treatment episode following 30 days with no MOUD. All office- and facility-based MOUD administrations were classified as in-person initiations. Telehealth vs. outpatient initiation for prescription fills was determined by identifying outpatient visits within 7 days before to 3 days after the prescription fill with either a matching prescriber ID for the prescription and provider ID for the visit or with an opioid use disorder diagnosis at the visit and then applying state-specific definitions for telehealth. MOUD prescription fills with no outpatient visits within 3 days prior to 7 days after the prescription fill meeting these criteria were unclassified.

Note: Mean proportion of days covered with MOUD in the 90 days after initiation calculated for May 2019-September 2020 to ensure all initiations had 90 days of follow-up in our data.

**eFigure 2.** Monthly Percentage of Outpatient Initiation<sup>a</sup> of Medication for Opioid Use Disorder (MOUD) by Modality in 10 States<sup>b</sup>

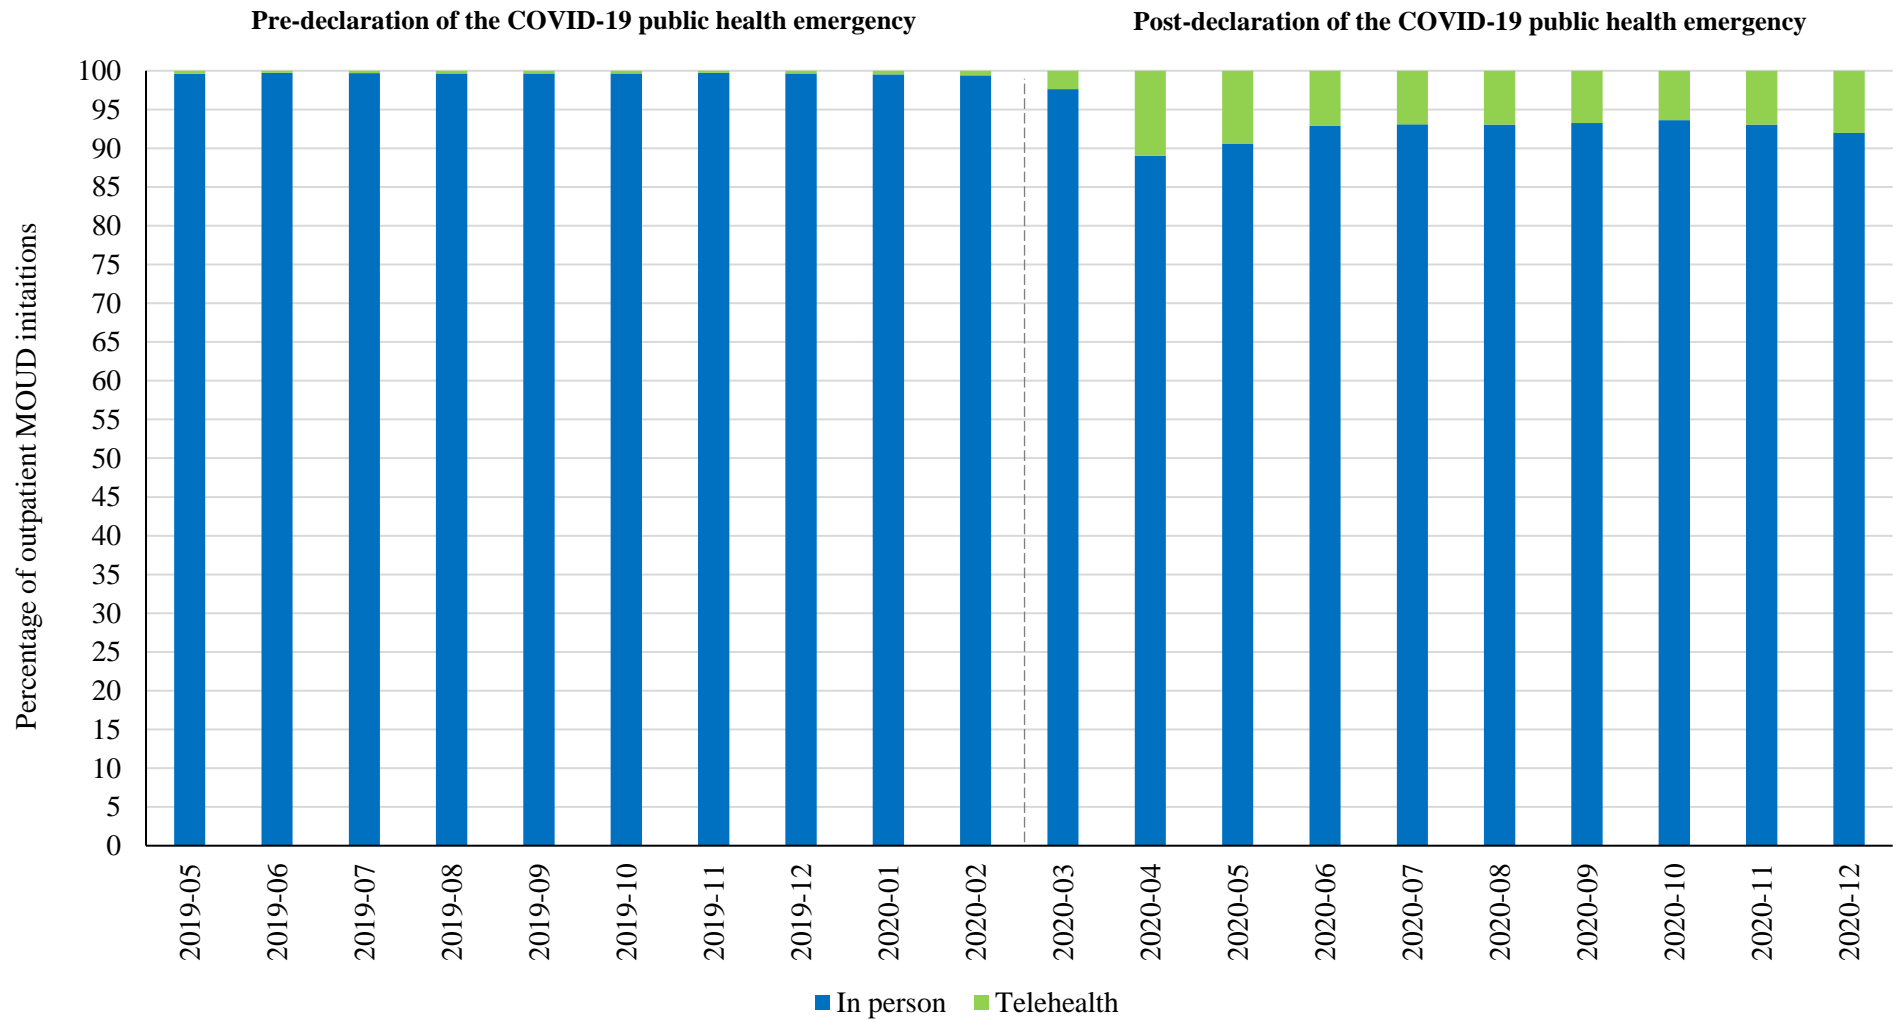

<sup>a</sup>Initiation defined as a new MOUD treatment episode following 30 days with no MOUD. All office- and facility-based MOUD administrations were classified as in-person initiations. Telehealth vs. outpatient initiation for prescription fills was determined by identifying outpatient visits within 7 days before to 3 days after the prescription fill with either a matching prescriber ID for the prescription and provider ID for the visit or with an opioid use disorder diagnosis at the visit and then applying state-specific definitions for telehealth. MOUD prescription fills with no outpatient visits within 7 days before to 3 days after the prescription fill meeting these criteria were unclassified.

<sup>b</sup>Non-dual full benefit Medicaid enrollees ages 18-64 years in Kentucky, Maine, Maryland, Michigan, North Carolina, Ohio, Pennsylvania, Virginia, West Virginia, Wisconsin

**eFigure 3.** Monthly Rates of Outpatient Initiation<sup>a</sup> of Medication for Opioid Use Disorder (MOUD) per 100,000 Medicaid Enrollees by Modality in 10 States<sup>b</sup>

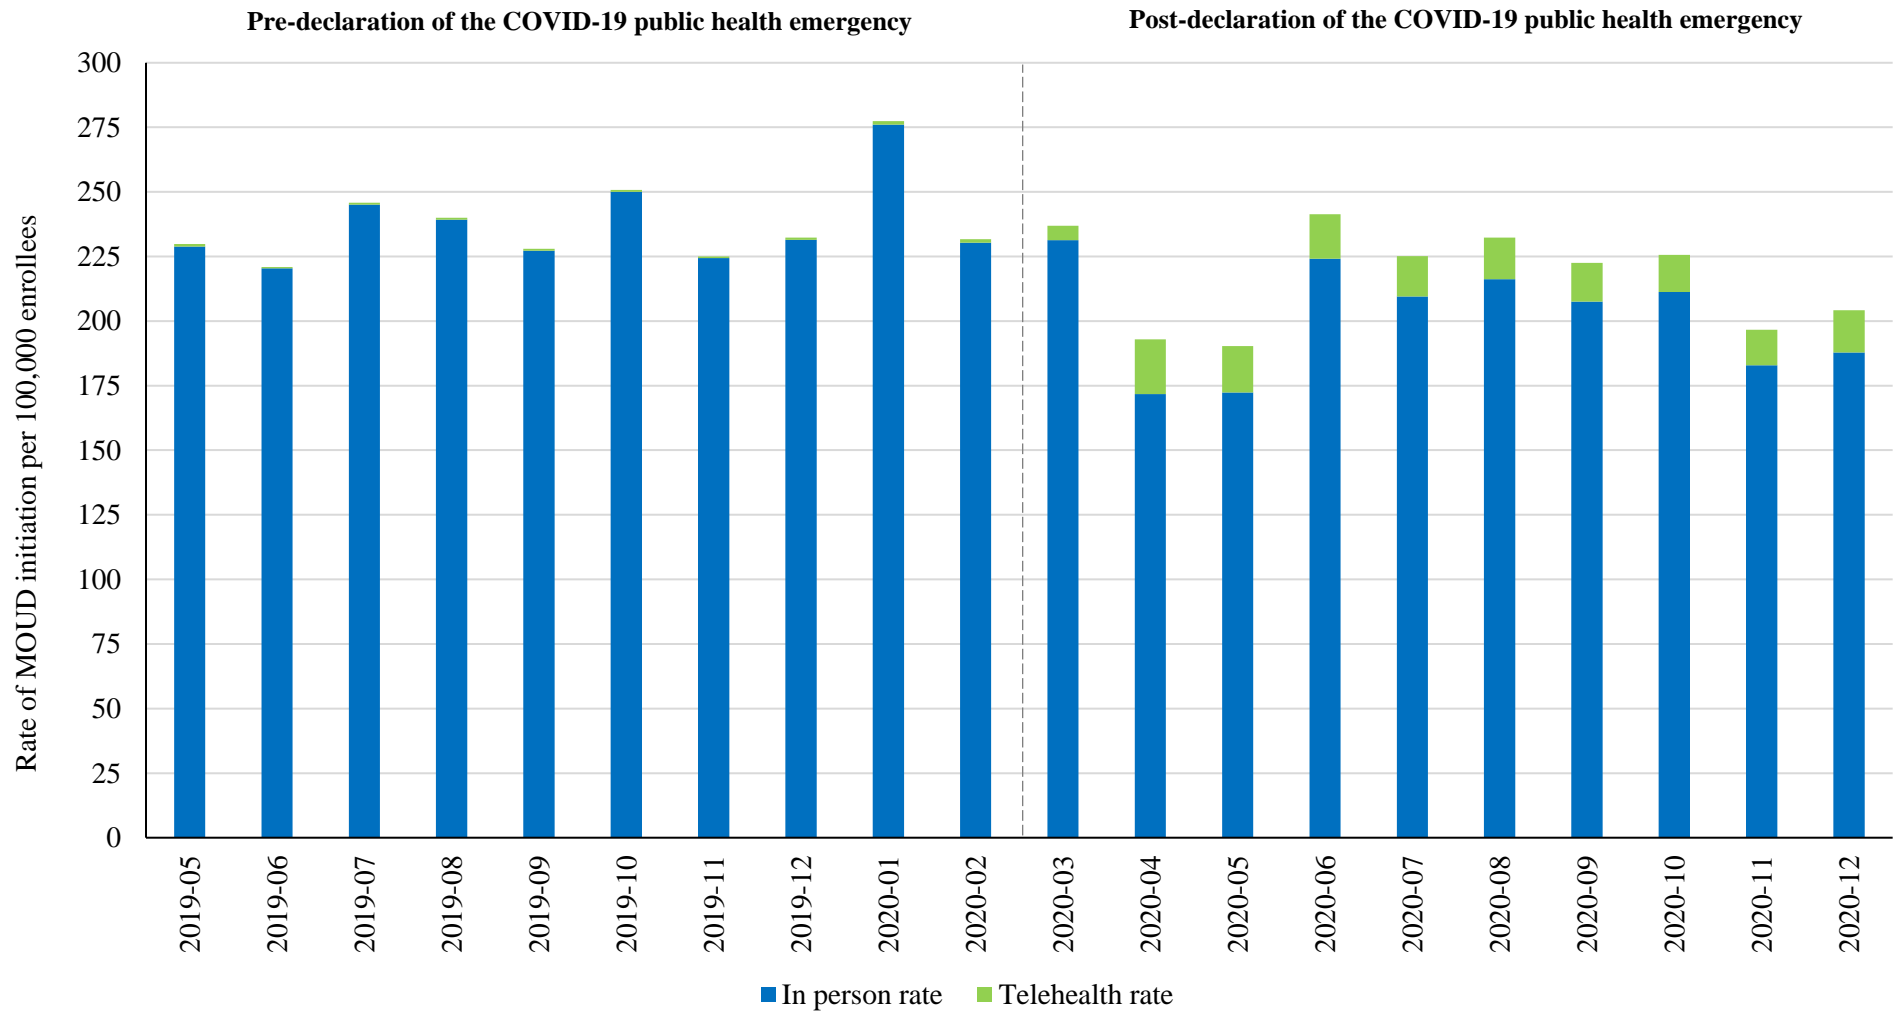

<sup>a</sup>Initiation defined as a new MOUD treatment episode following 30 days with no MOUD. All office- and facility-based MOUD administrations were classified as in-person initiations. Telehealth vs. outpatient initiation for prescription fills was determined by identifying outpatient visits within 7 days before to 3 days after the prescription fill with either a matching prescriber ID for the prescription and provider ID for the visit or with an opioid use disorder diagnosis at the visit and then applying state-specific definitions for telehealth. MOUD prescription fills with no outpatient visits within 7 days before to 3 days after the prescription fill meeting these criteria were unclassified.

<sup>b</sup>Non-dual full benefit Medicaid enrollees ages 18-64 years in Kentucky, Maine, Maryland, Michigan, North Carolina, Ohio, Pennsylvania, Virginia, West Virginia, Wisconsin

**eFigure 4.** Monthly Rates of Outpatient Initiation<sup>a</sup> Medication for Opioid Use Disorder (MOUD) per 100,000 Medicaid Enrollees With a Common Definition for Telehealth in 10 States<sup>b</sup>

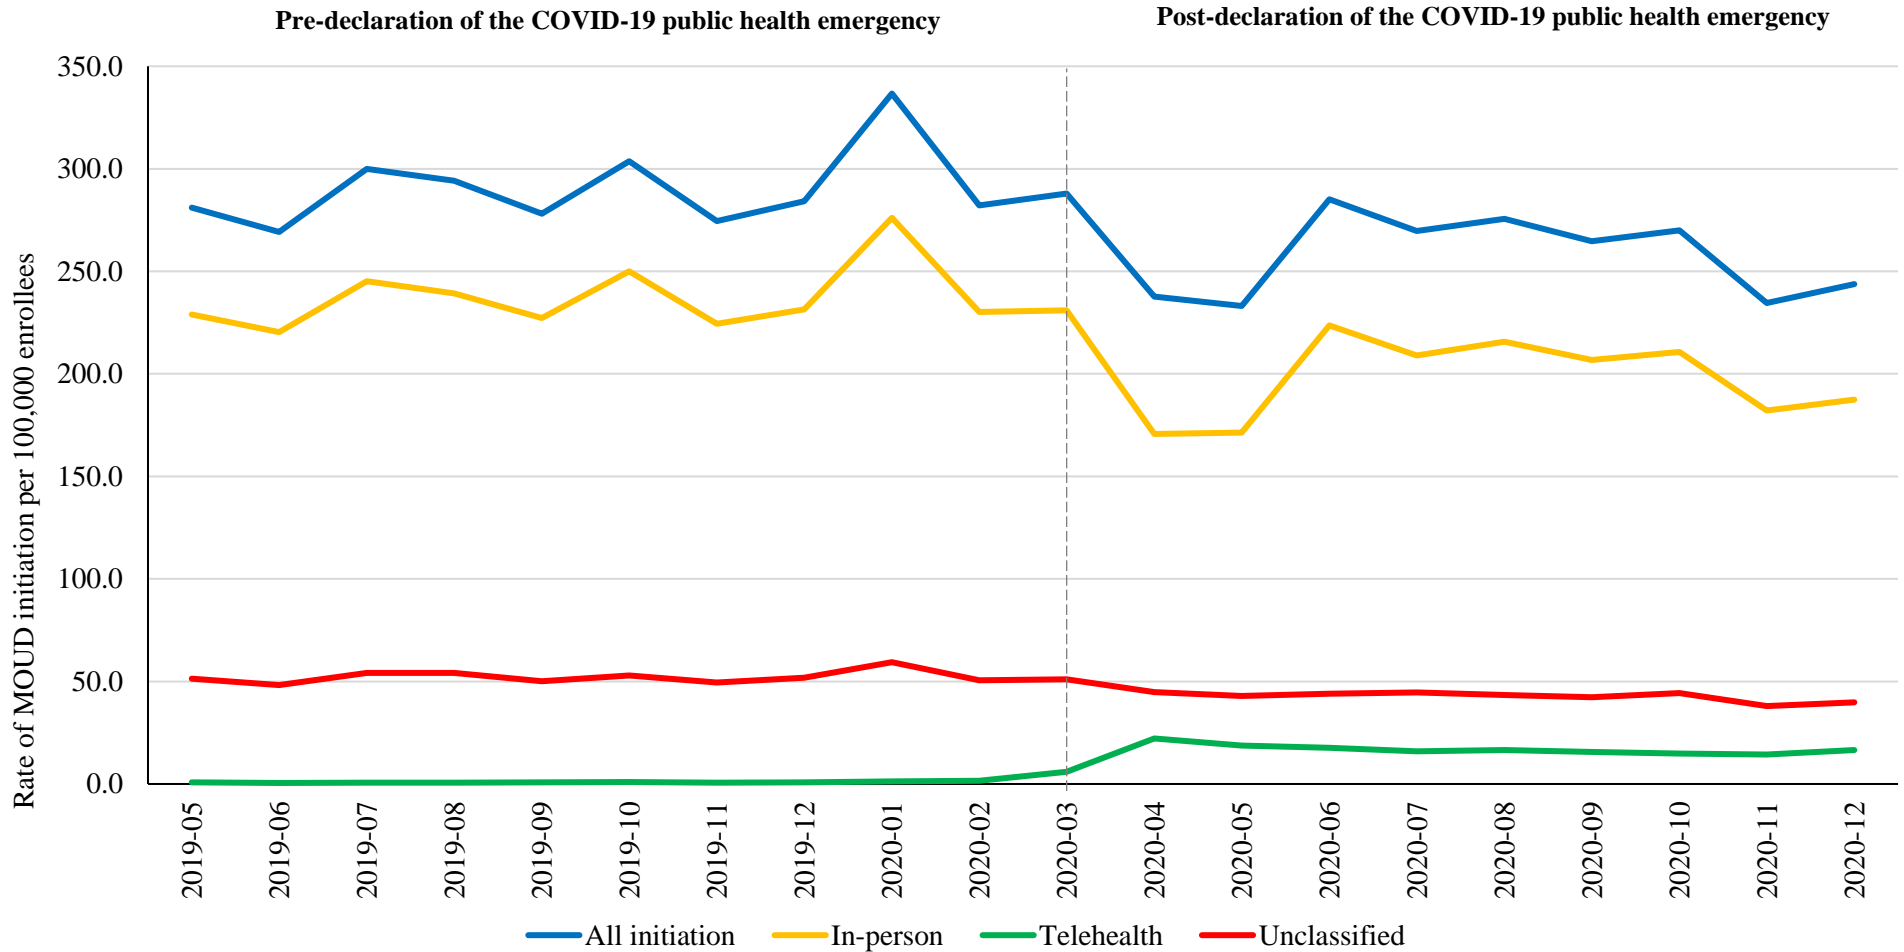

<sup>a</sup>Initiation defined as a new MOUD treatment episode following 30 days with no MOUD. All office- and facility-based MOUD administrations were classified as in-person initiations. Telehealth vs. outpatient initiation for prescription fills was determined by identifying outpatient visits within 7 days before to 3 days after the prescription fill with either a matching prescriber ID for the prescription and provider ID for the visit or with an opioid use disorder diagnosis at the visit and then applying state-specific definitions for telehealth. MOUD prescription fills with no outpatient visits within 7 days before to 3 days after the prescription fill meeting these criteria were unclassified.



<sup>b</sup>Non-dual full benefit Medicaid enrollees ages 18-64 years in Kentucky, Maine, Maryland, Michigan, North Carolina, Ohio, Pennsylvania, Virginia, West Virginia, Wisconsin  
**Figure 5.** Monthly Rates of Outpatient Initiation<sup>a</sup> of Medication for Opioid Use Disorder (MOUD) per 100,000 Medicaid Enrollees by Type of MOUD in 10 States<sup>b</sup>

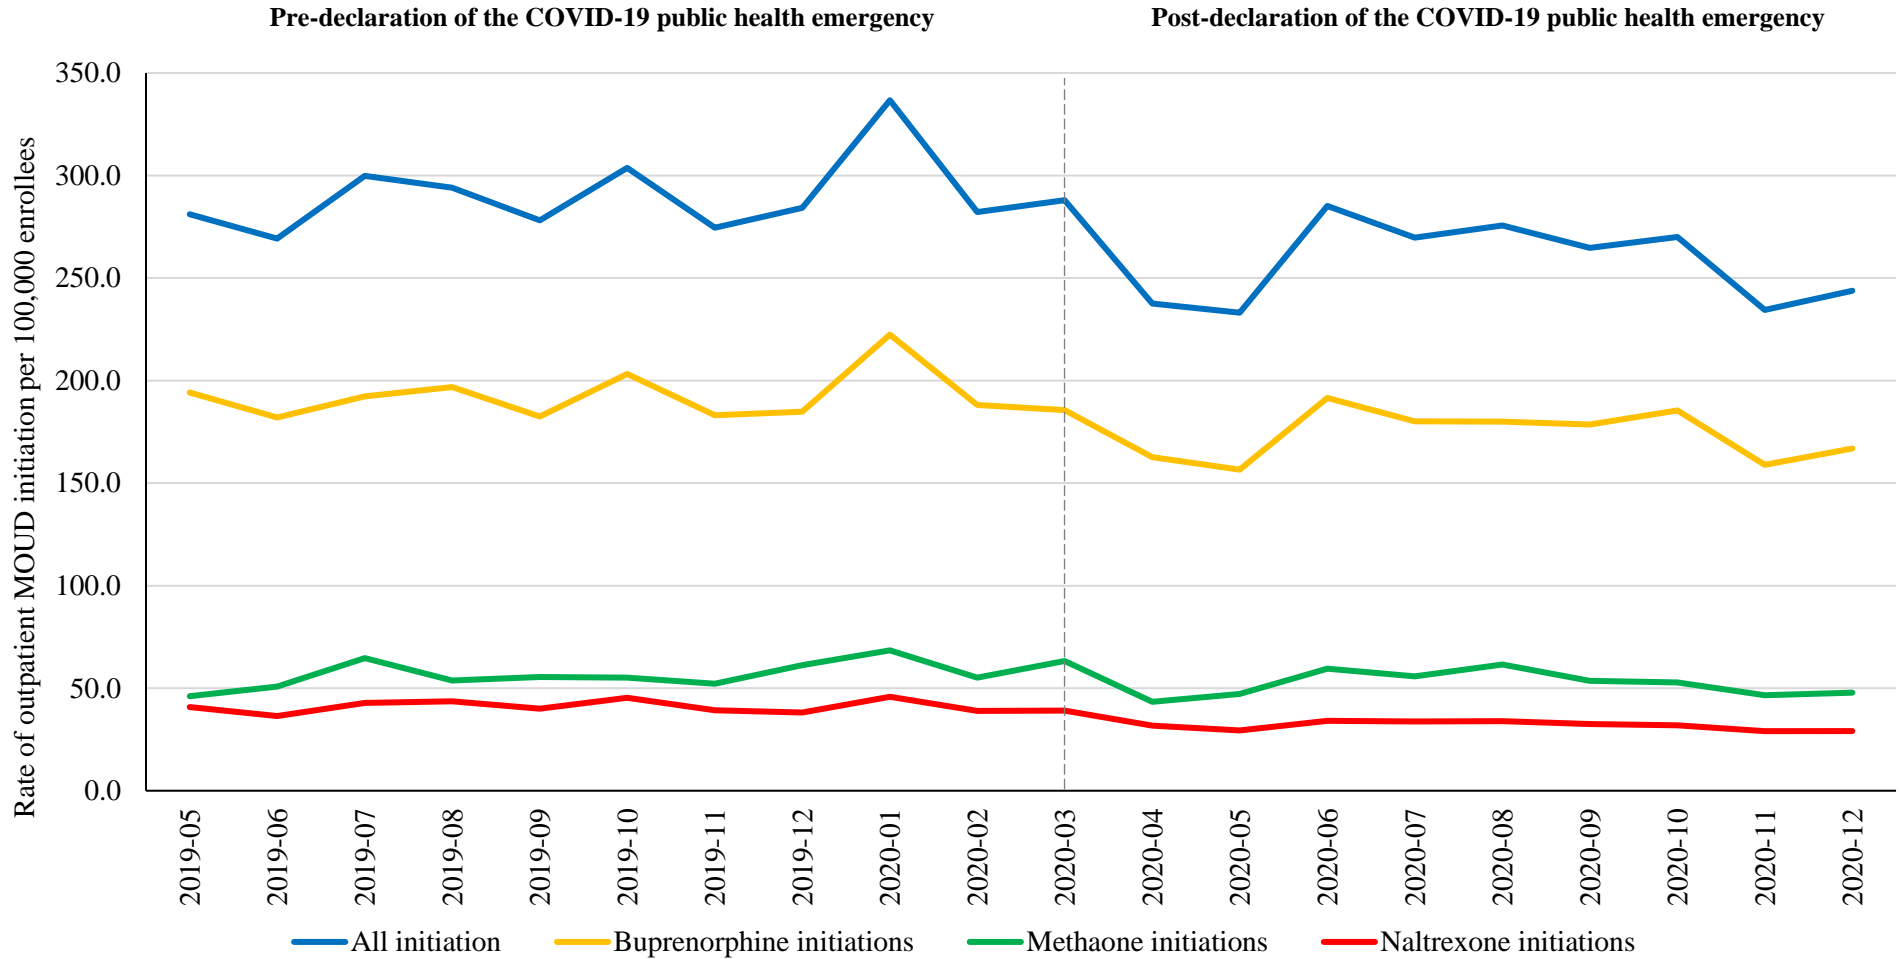

<sup>a</sup>Initiation defined as a new MOUD treatment episode following 30 days with no MOUD. All office- and facility-based MOUD administrations were classified as in-person

initiations. Telehealth vs. outpatient initiation for prescription fills was determined by identifying outpatient visits within 7 days before to 3 days after the prescription fill with either a matching prescriber ID for the prescription and provider ID for the visit or with an opioid use disorder diagnosis at the visit and then applying state-specific definitions for telehealth. MOUD prescription fills with no outpatient visits within 7 days before to 3 days after after the prescription fill meeting these criteria were unclassified.

<sup>b</sup>Non-dual full benefit Medicaid enrollees ages 18-64 years in Kentucky, Maine, Maryland, Michigan, North Carolina, Ohio, Pennsylvania, Virginia, West Virginia, Wisconsin  
**eFigure 6.** Monthly Rates of Any Medication for Opioid Use Disorder (MOUD) per 100,000 Medicaid Enrollees by State<sup>a</sup>

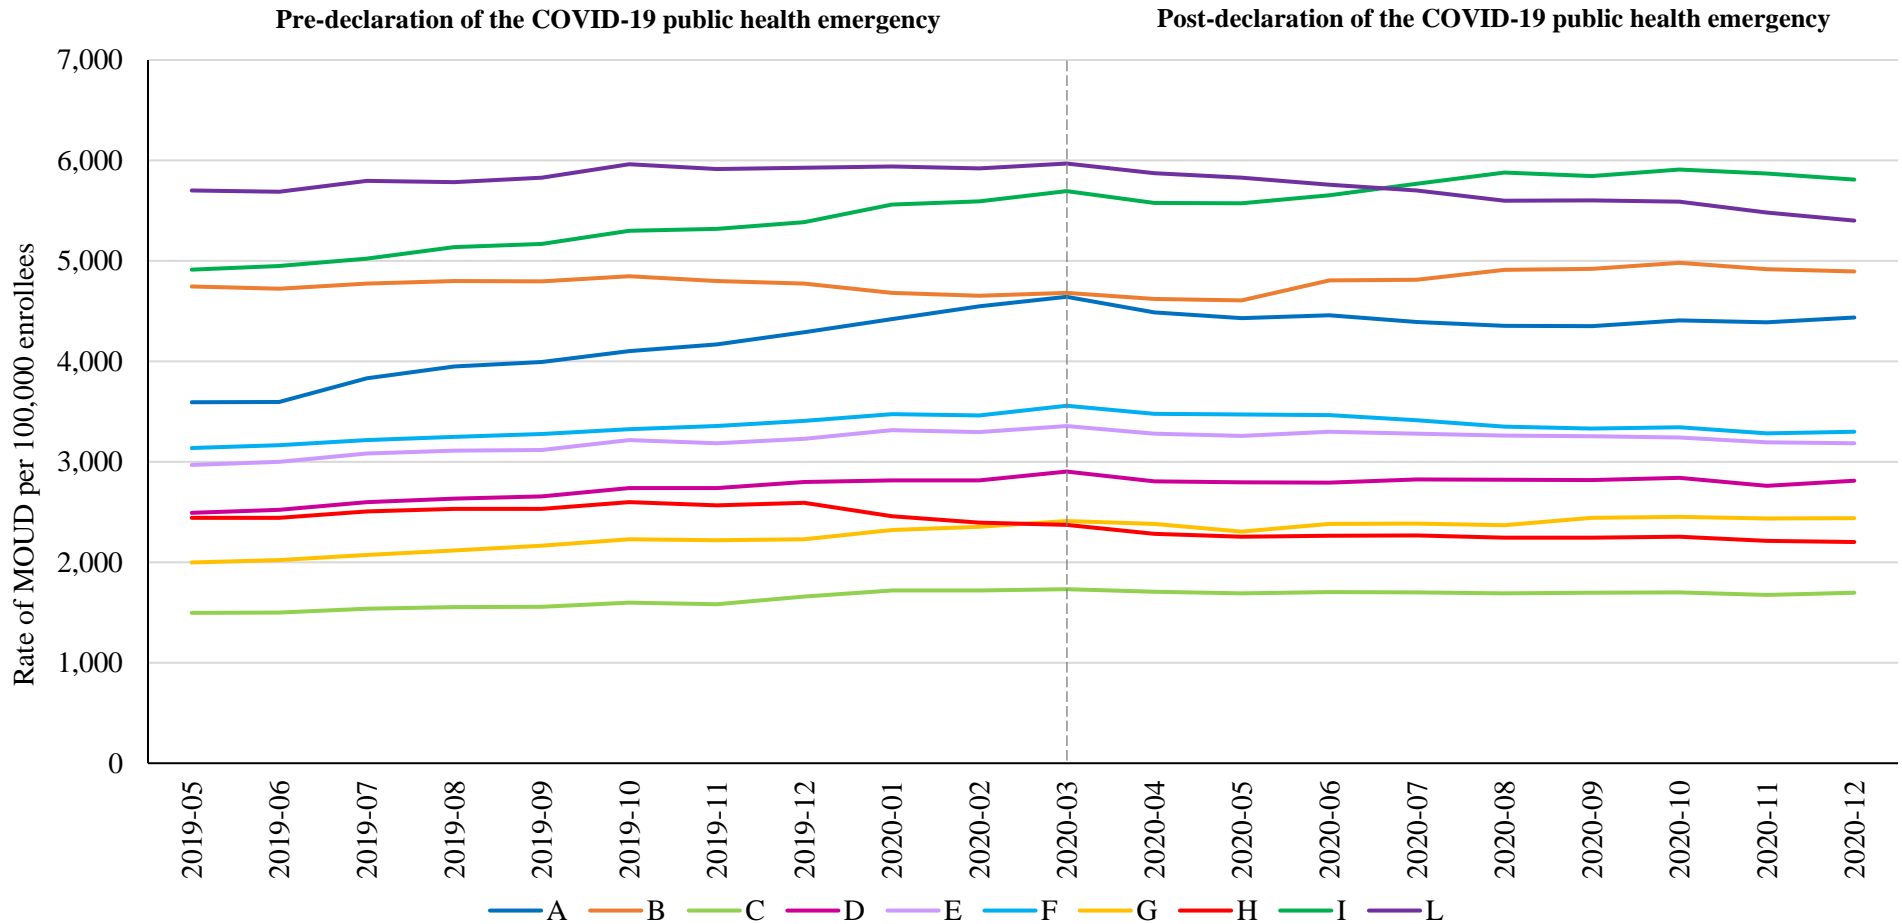

<sup>a</sup>Non-dual full benefit Medicaid enrollees ages 18-64 years in Kentucky, Maine, Maryland, Michigan, North Carolina, Ohio, Pennsylvania, Virginia, West Virginia, Wisconsin

**eFigure 7.** Monthly Rates of Outpatient Initiation<sup>a</sup> of Medication for Opioid Use Disorder (MOUD) per 100,000 Medicaid Enrollees by State<sup>b</sup>

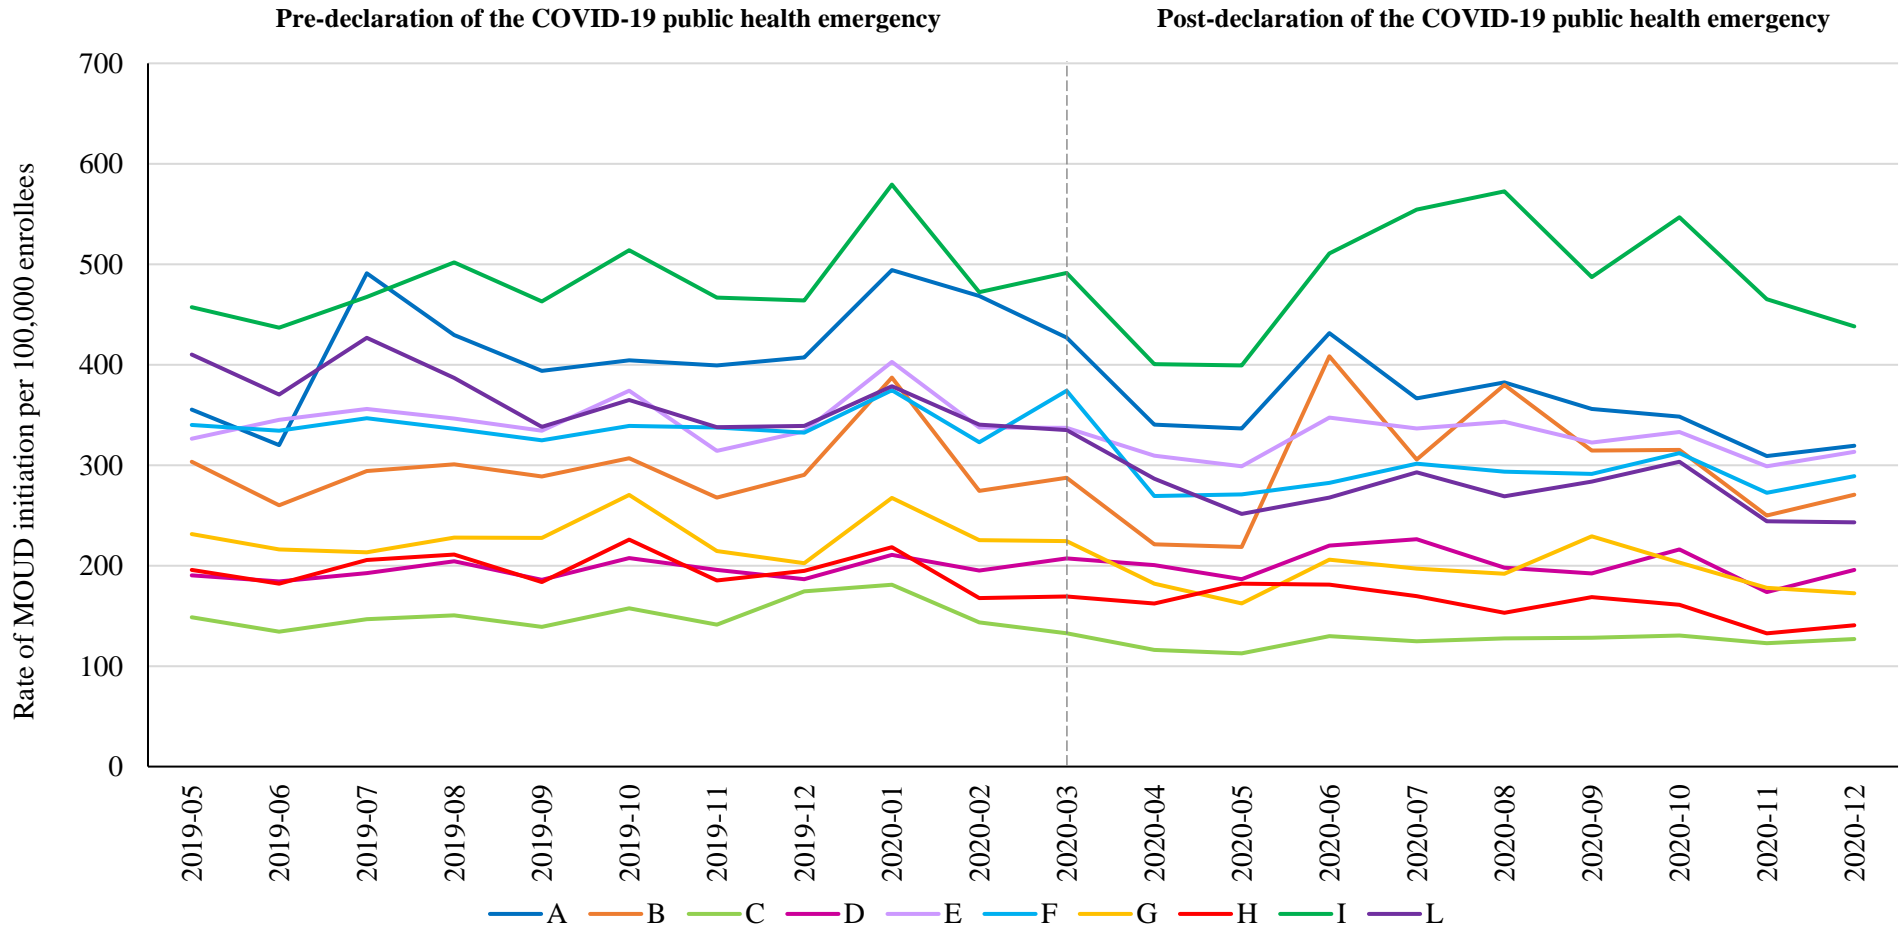

<sup>a</sup>Initiation defined as a new MOUD treatment episode following 30 days with no MOUD. All office- and facility-based MOUD administrations were classified as in-person initiations. Telehealth vs. outpatient initiation for prescription fills was determined by identifying outpatient visits within 7 days before to 3 days after the prescription fill with either a matching prescriber ID for the prescription and provider ID for the visit or with an opioid use disorder diagnosis at the visit and then applying state-specific definitions for telehealth. MOUD prescription fills with no outpatient visits within 7 days before to 3 days after the prescription fill meeting these criteria were unclassified.

<sup>b</sup>Non-dual full benefit Medicaid enrollees ages 18-64 years in Kentucky, Maine, Maryland, Michigan, North Carolina, Ohio, Pennsylvania, Virginia, West Virginia, Wisconsin

**eFigure 8.** Monthly Mean Proportion of Days Covered With Medication for Opioid Use Disorder (MOUD) in the 90 Days After Initiation Among Medicaid Enrollees by State<sup>a</sup>

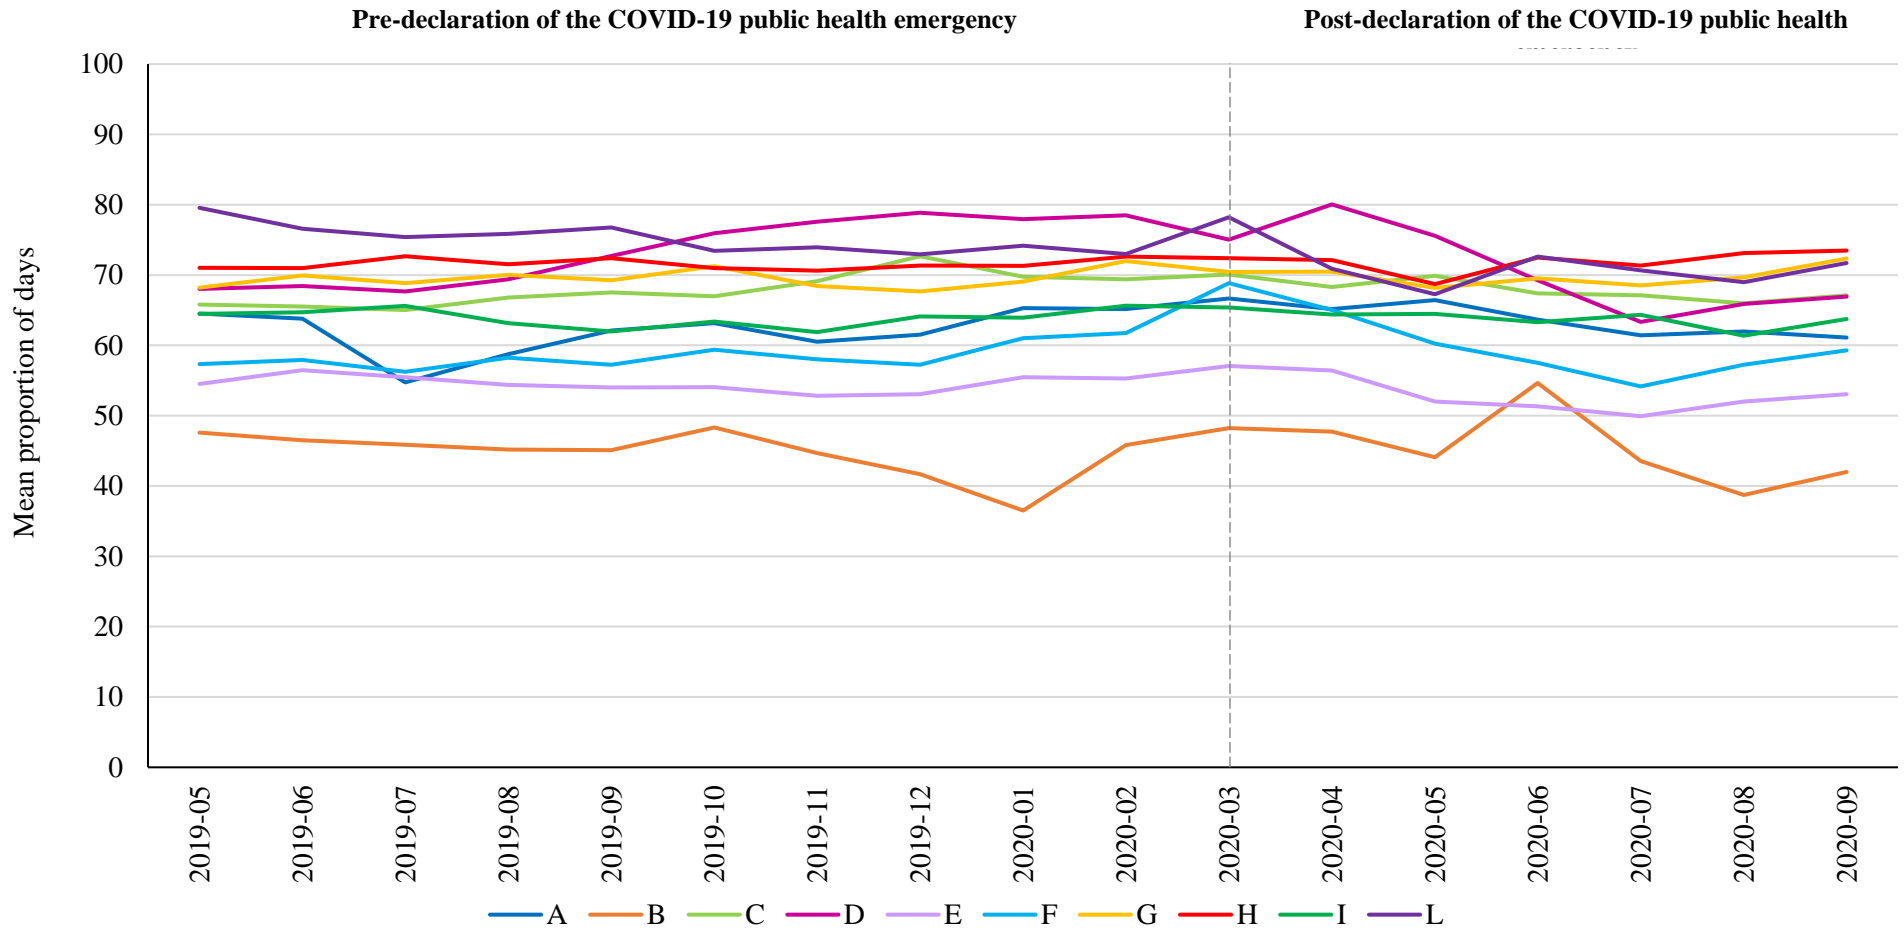

<sup>a</sup>Non-dual full benefit Medicaid enrollees ages 18-64 years in Kentucky, Maine, Maryland, Michigan, North Carolina, Ohio, Pennsylvania, Virginia, West Virginia, Wisconsin

**eFigure 9.** Monthly Rates of Any Medication for Opioid Use Disorder (MOUD) per 100,000 Medicaid Enrollees by Age Group<sup>a</sup>

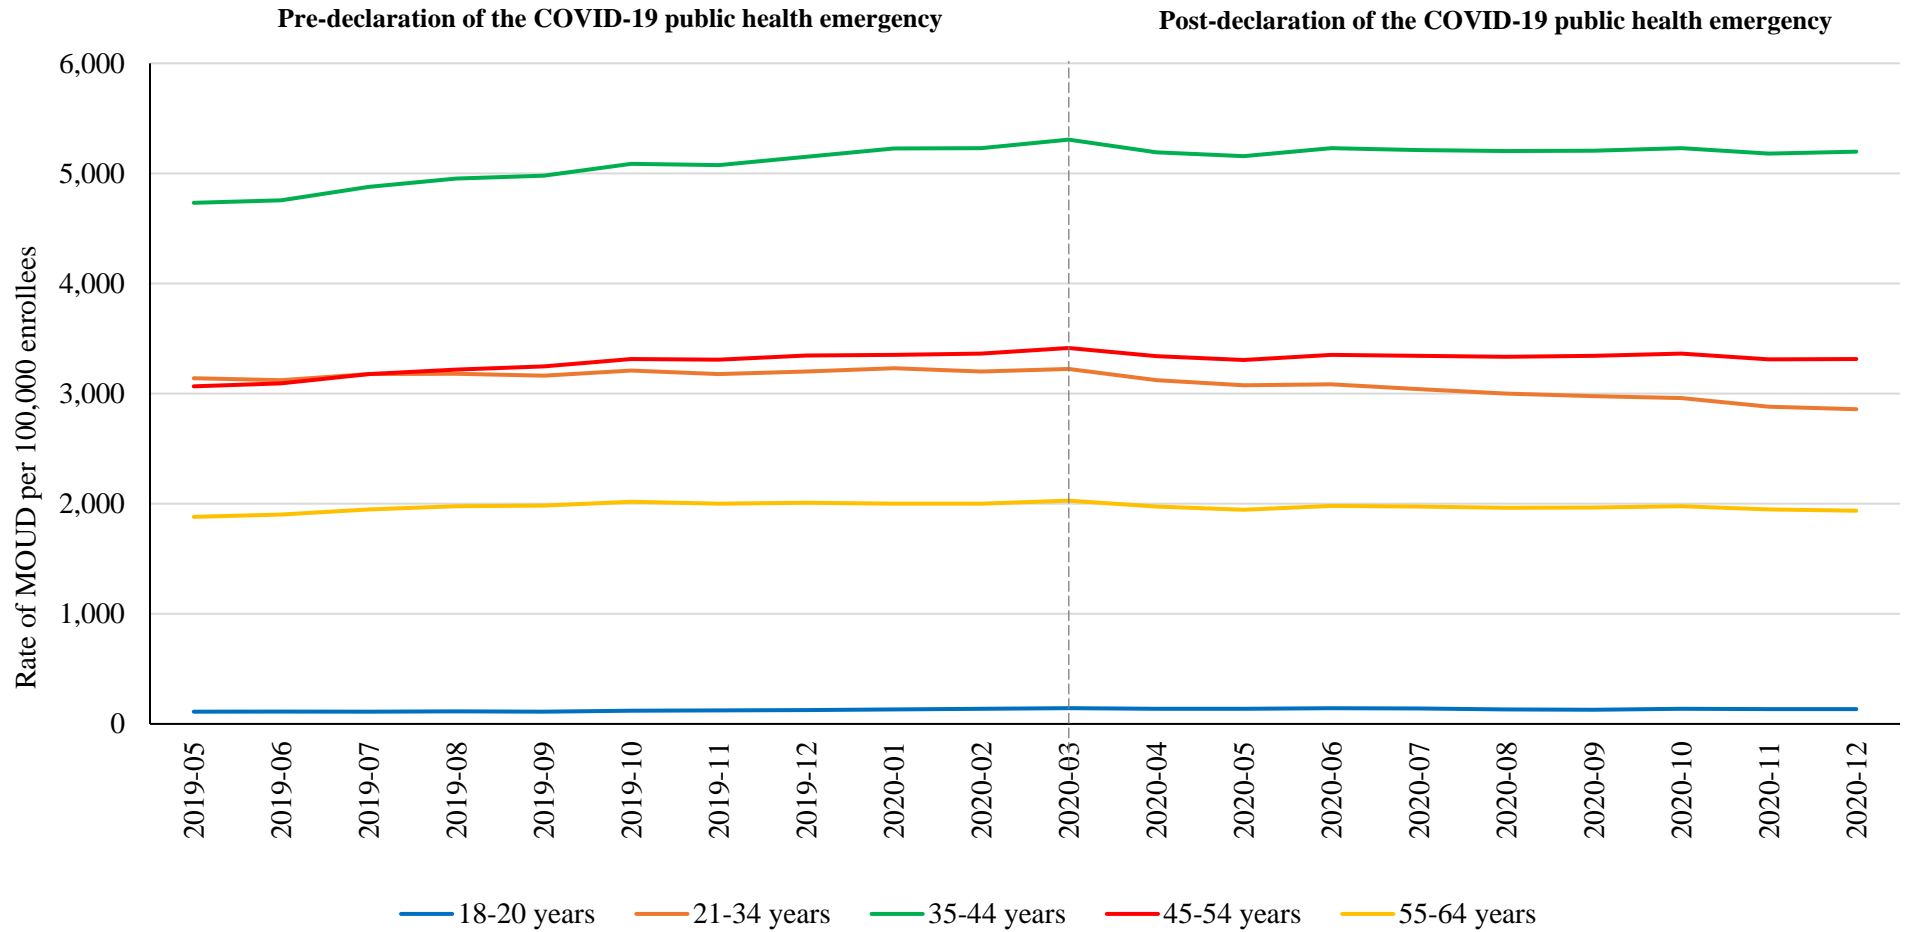

<sup>a</sup>Non-dual full benefit Medicaid enrollees ages 18-64 years in Kentucky, Maine, Maryland, Michigan, North Carolina, Ohio, Pennsylvania, Virginia, West Virginia, Wisconsin

**eFigure 10.** Monthly Rates of Outpatient Initiation<sup>a</sup> of Medication for Opioid Use Disorder (MOUD) per 100,000 Medicaid Enrollees by Age Group<sup>b</sup>

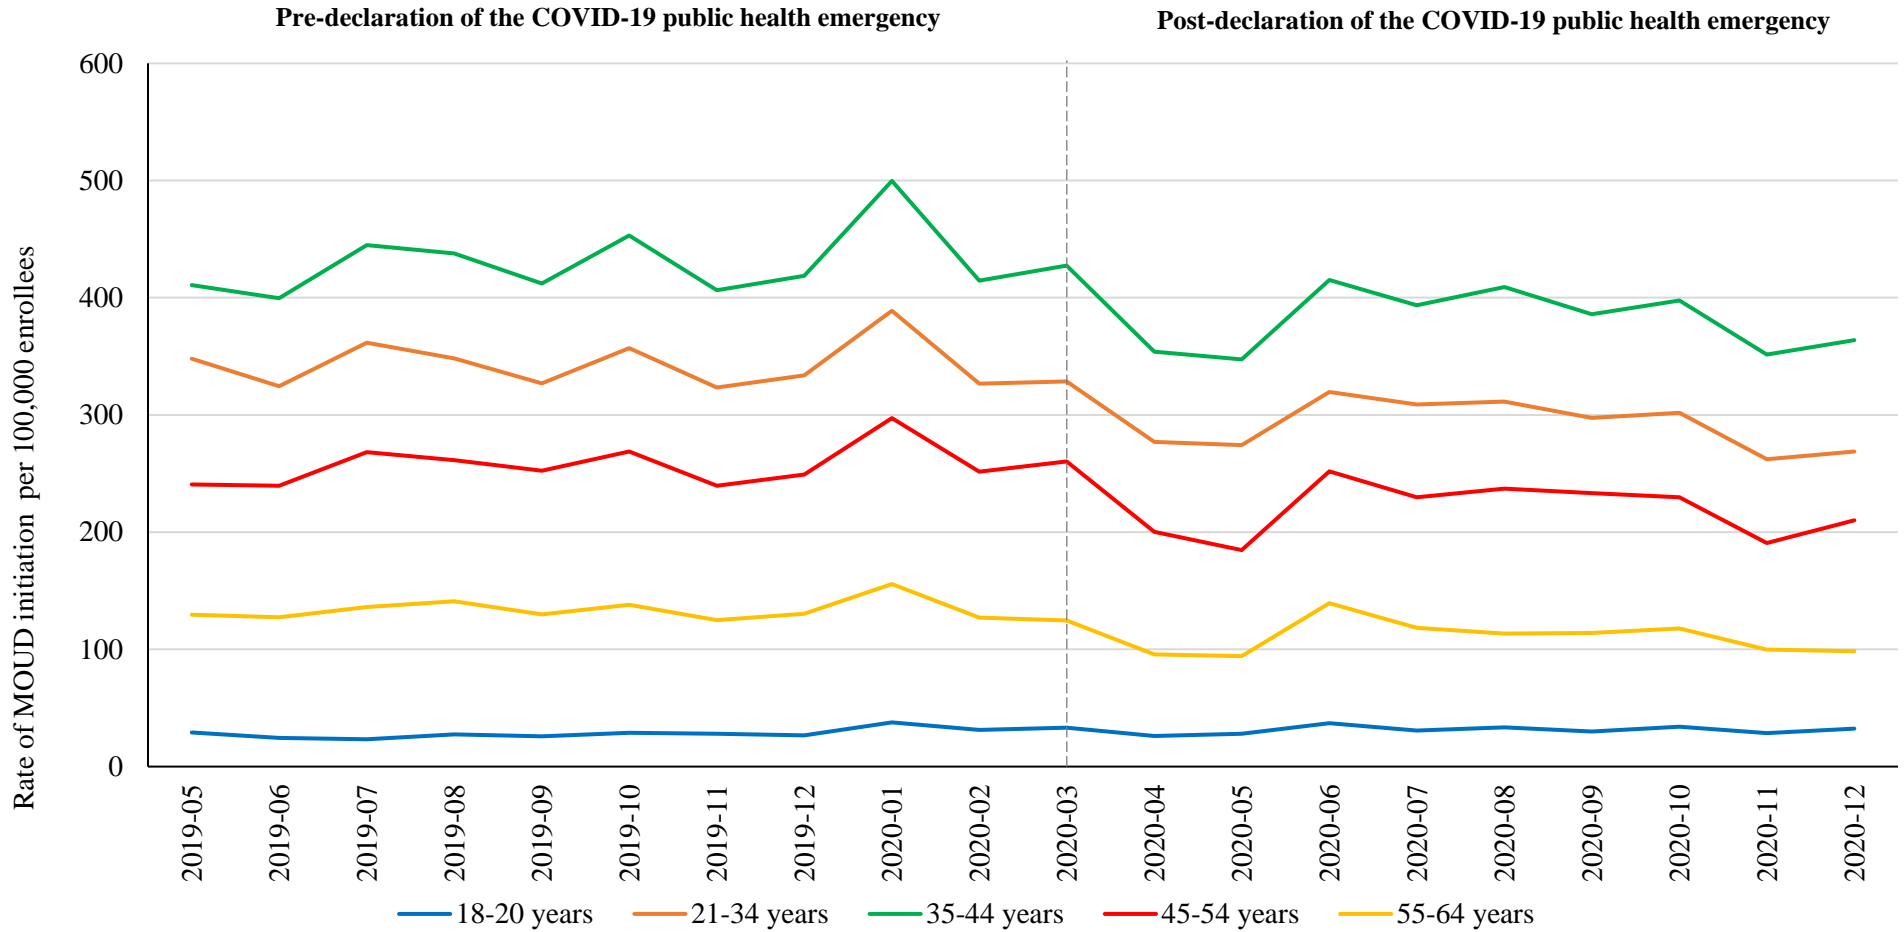

<sup>a</sup>Initiation defined as a new MOUD treatment episode following 30 days with no MOUD. All office- and facility-based MOUD administrations were classified as in-person initiations. Telehealth vs. outpatient initiation for prescription fills was determined by identifying outpatient visits within 7 days before to 3 days after the prescription fill with either a matching prescriber ID for the prescription and provider ID for the visit or with an opioid use disorder diagnosis at the visit and then applying state-specific definitions for telehealth. MOUD prescription fills with no outpatient visits within 7 days before to 3 days after the prescription fill meeting these criteria were unclassified.

<sup>b</sup>Non-dual full benefit Medicaid enrollees ages 18-64 years in Kentucky, Maine, Maryland, Michigan, North Carolina, Ohio, Pennsylvania, Virginia, West Virginia, Wisconsin

**eFigure 11.** Monthly Rates of Any Medication for Opioid Use Disorder (MOUD) per 100,000 Medicaid Enrollees by Race and Ethnicity<sup>a</sup>

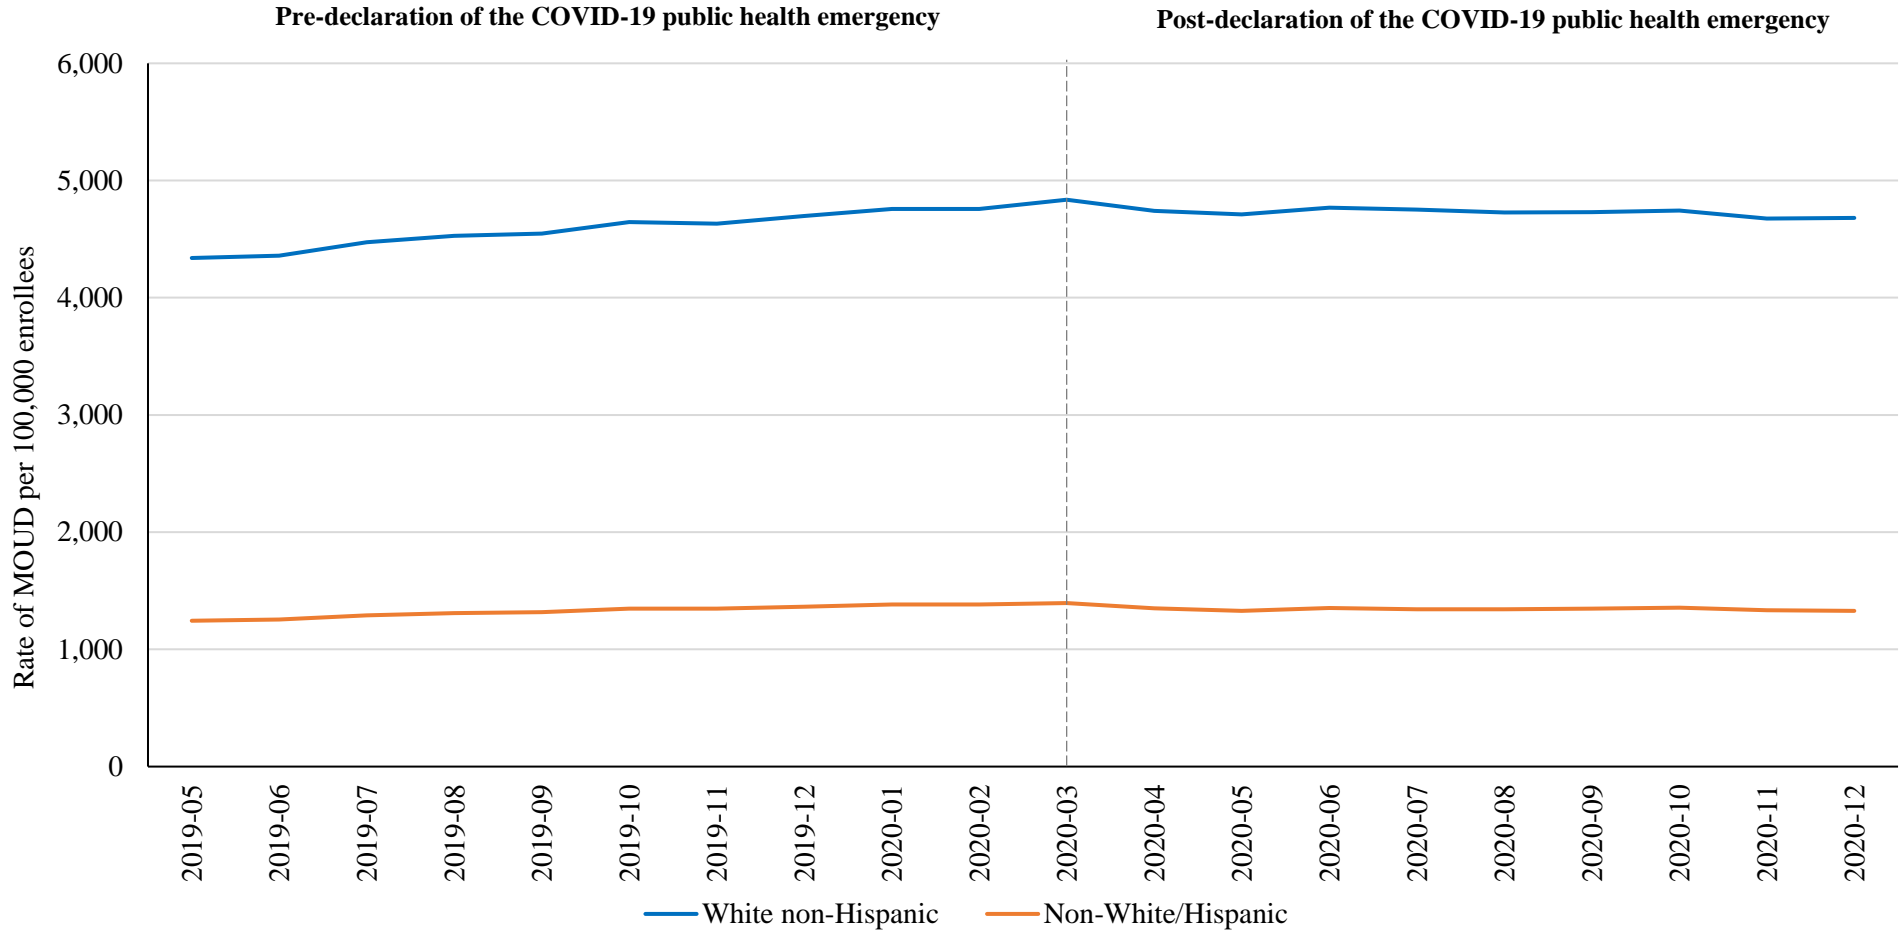

<sup>a</sup>Non-dual full benefit Medicaid enrollees ages 18-64 years in Kentucky, Maine, Maryland, Michigan, North Carolina, Ohio, Pennsylvania, Virginia, West Virginia, Wisconsin

**eFigure 12.** Monthly Rates of Outpatient Initiation<sup>a</sup> of Medication for Opioid Use Disorder (MOUD) per 100,000 Medicaid Enrollees by Race and Ethnicity<sup>b</sup>

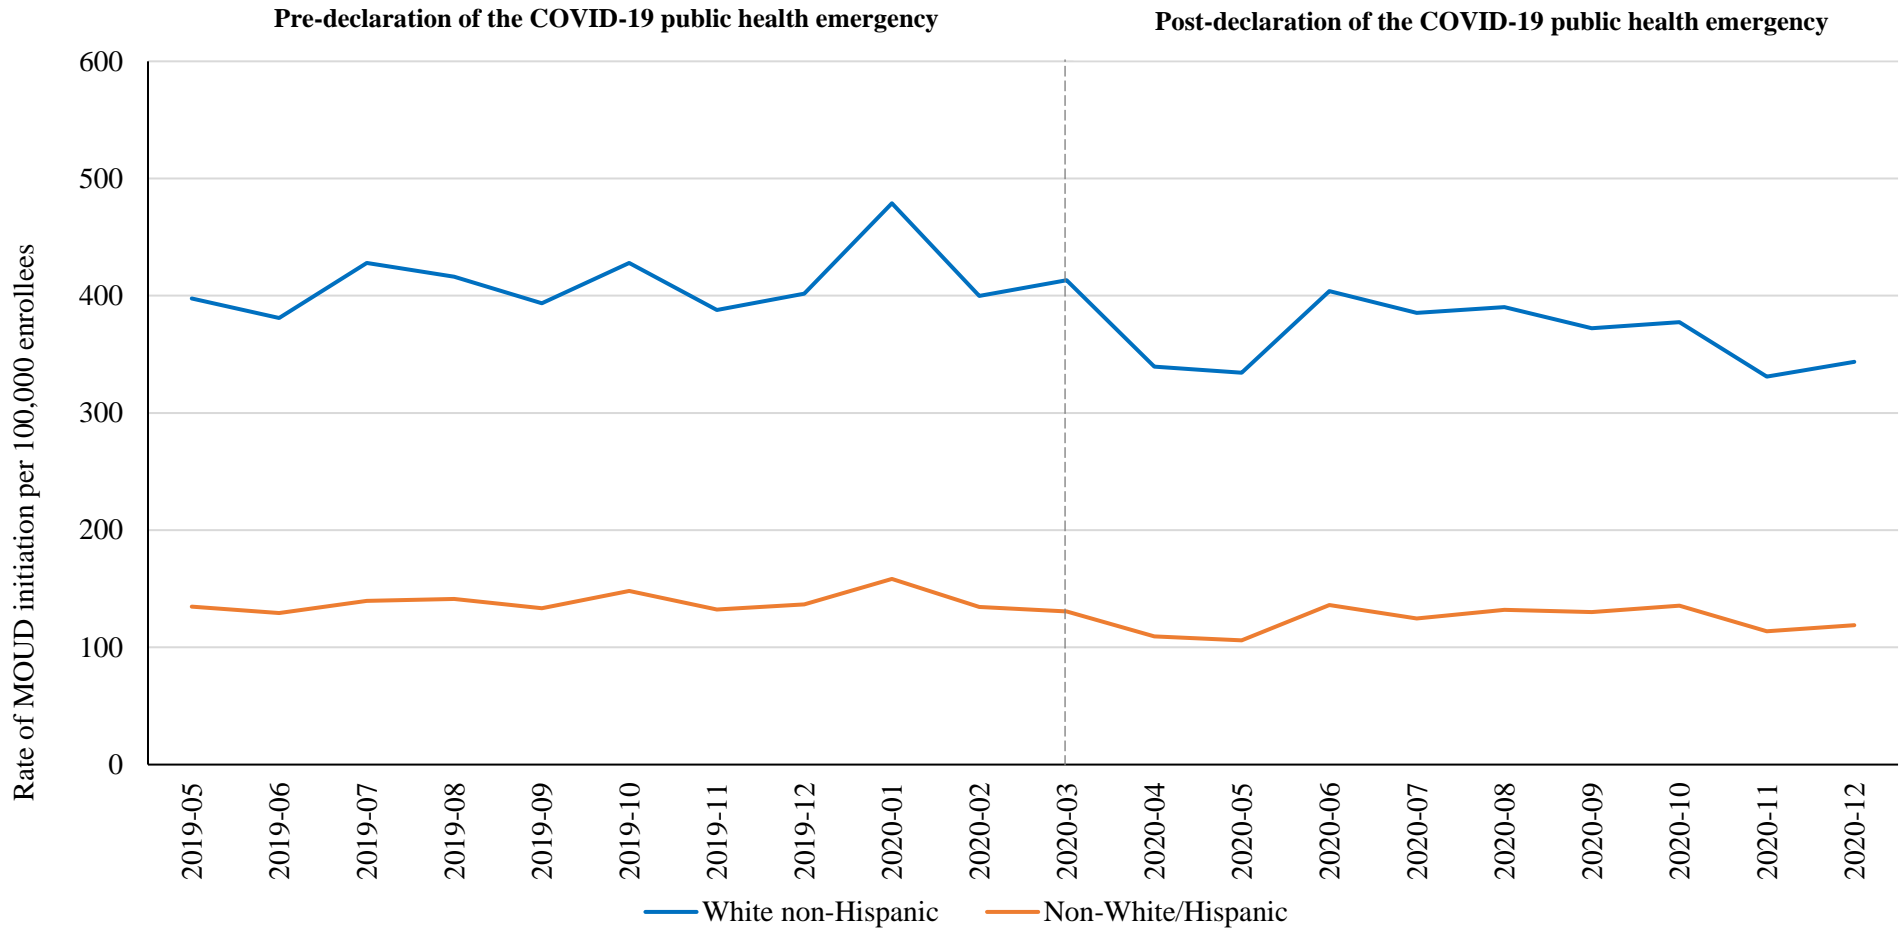

<sup>a</sup>Initiation defined as a new MOUD treatment episode following 30 days with no MOUD. All office- and facility-based MOUD administrations were classified as in-person initiations. Telehealth vs. outpatient initiation for prescription fills was determined by identifying outpatient visits within 7 days before to 3 days after the prescription fill with either a matching prescriber ID for the prescription and provider ID for the visit or with an opioid use disorder diagnosis at the visit and then applying state-specific definitions for telehealth. MOUD prescription fills with no outpatient visits within 7 days before to 3 days after the prescription fill meeting these criteria were unclassified.

<sup>b</sup>Non-dual full benefit Medicaid enrollees ages 18-64 years in Kentucky, Maine, Maryland, Michigan, North Carolina, Ohio, Pennsylvania, Virginia, West Virginia, Wisconsin



**eFigure 13.** Monthly Rates of Any Medication for Opioid Use Disorder (MOUD) per 100,000 Medicaid Enrollees by Sex<sup>a</sup>

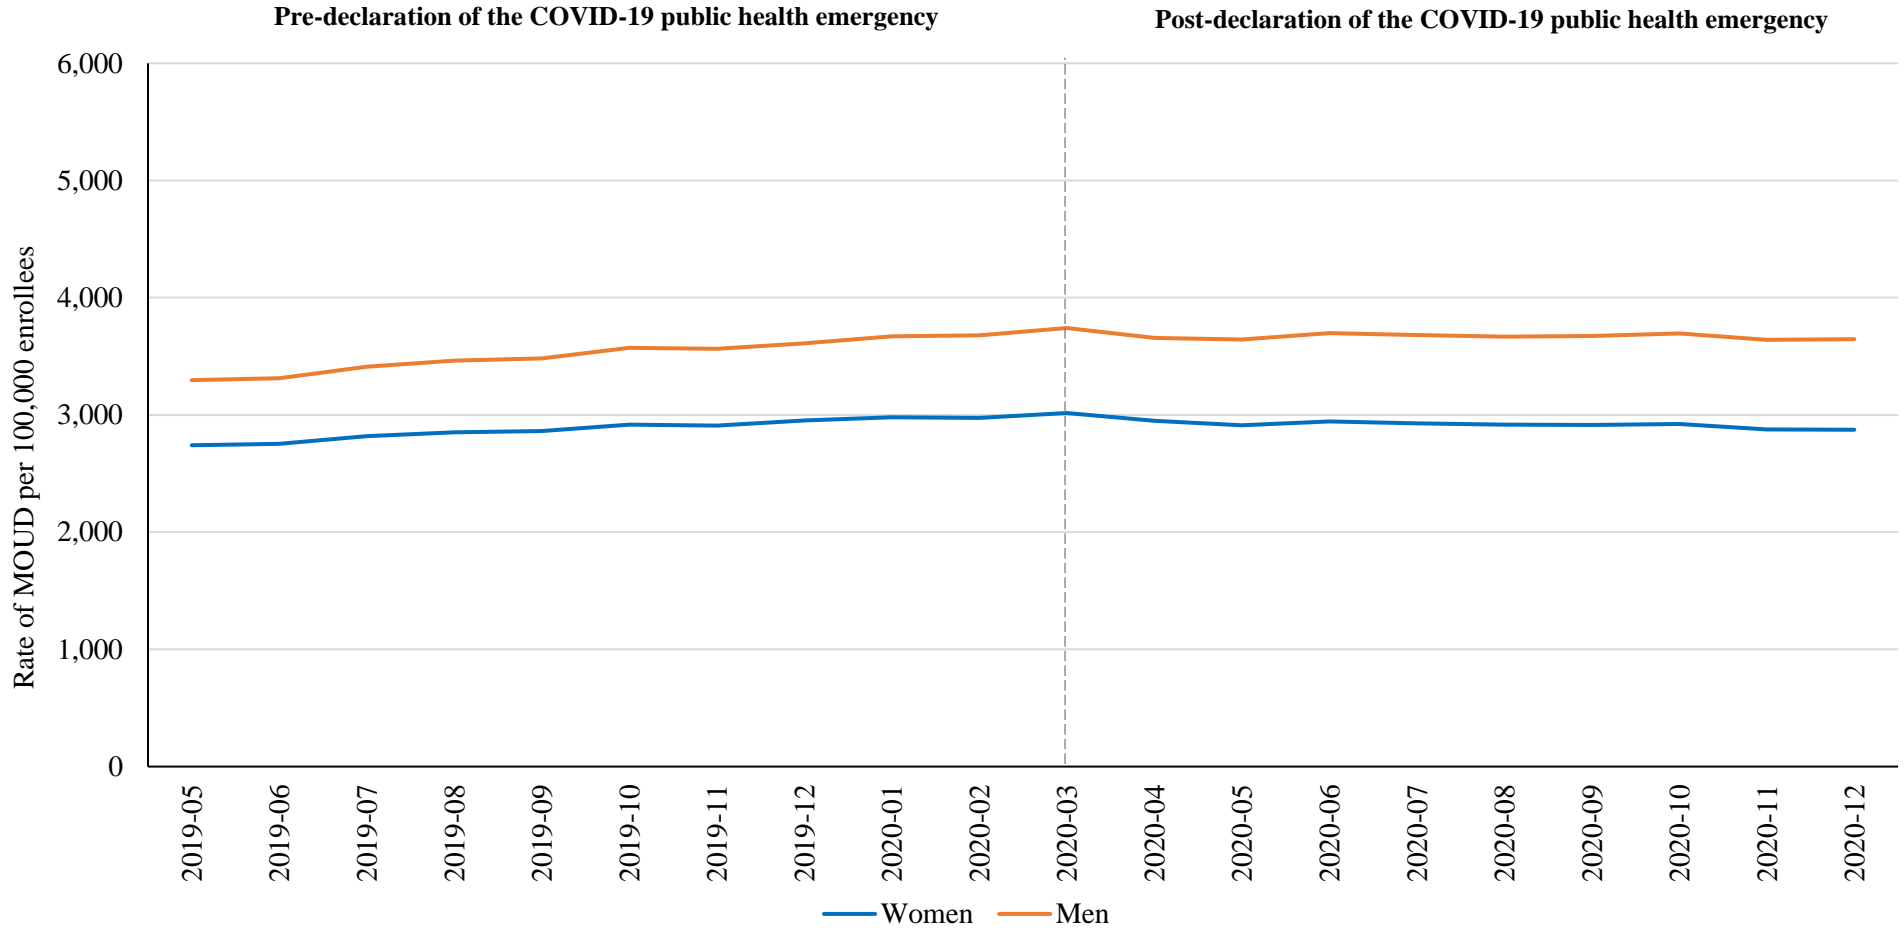

<sup>a</sup>Non-dual full benefit Medicaid enrollees ages 18-64 years in Kentucky, Maine, Maryland, Michigan, North Carolina, Ohio, Pennsylvania, Virginia, West Virginia, Wisconsin

**eFigure 14.** Monthly Rates of Outpatient Initiation<sup>a</sup> of Medication for Opioid Use Disorder (MOUD) per 100,000 Medicaid Enrollees by Sex<sup>b</sup>

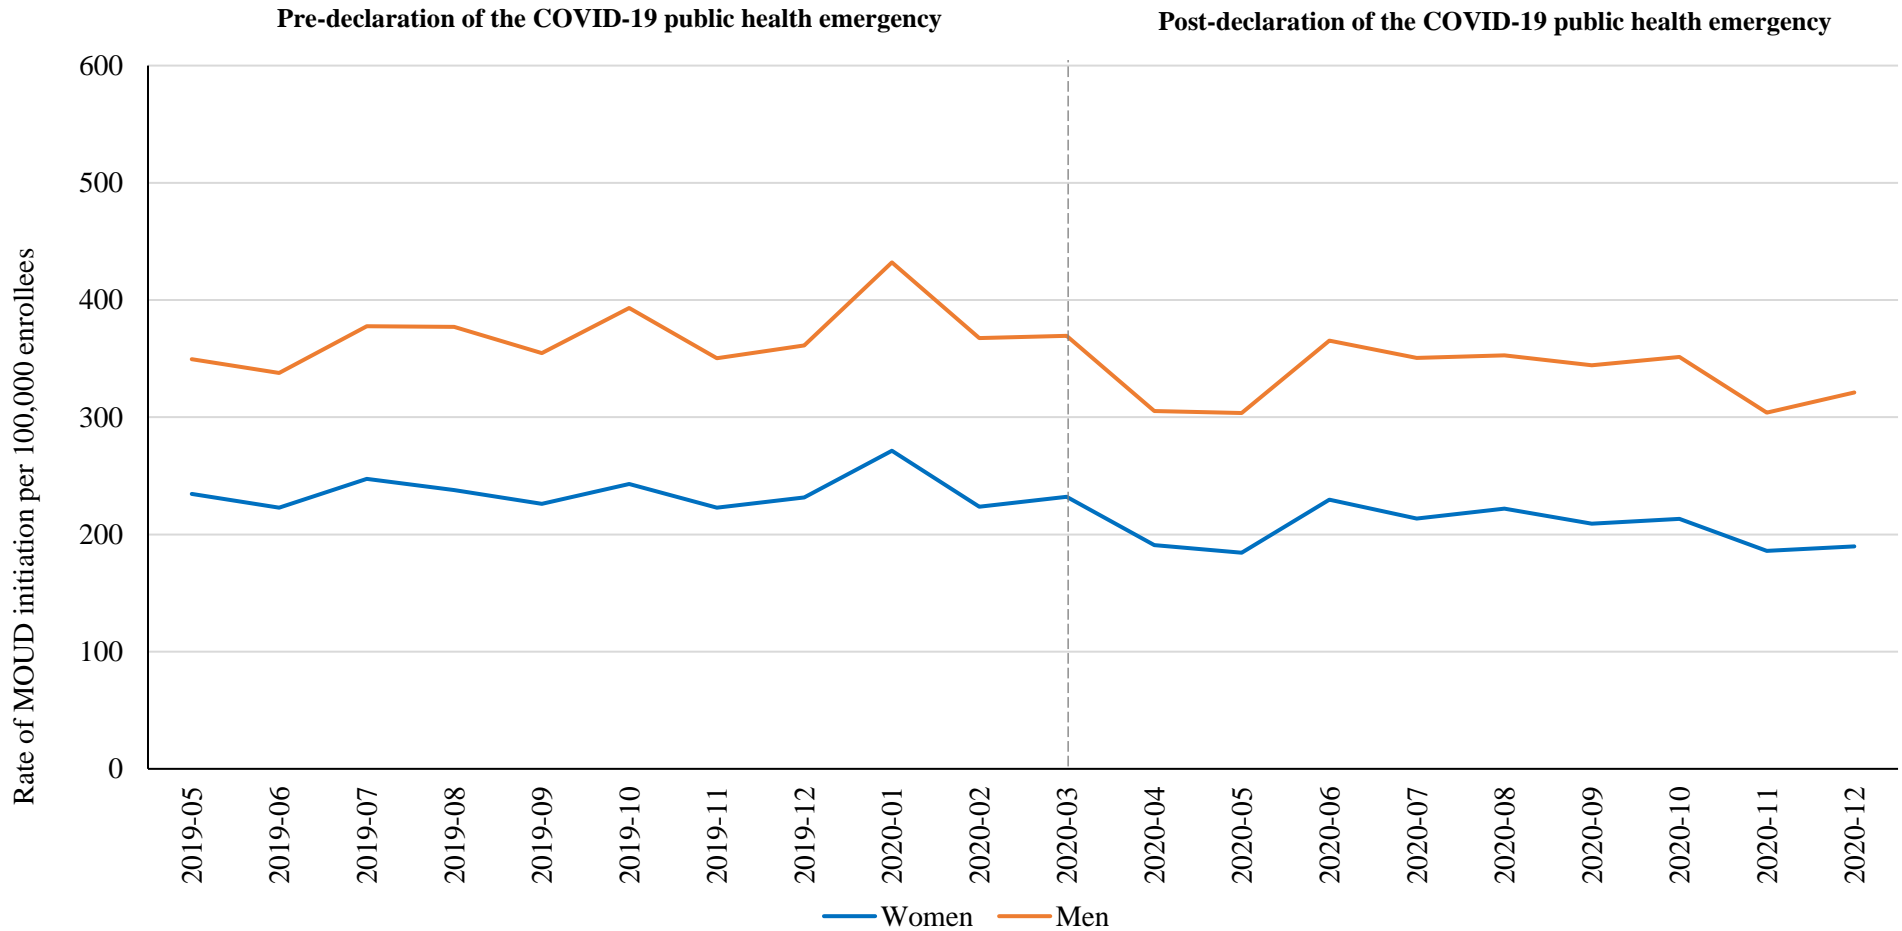

<sup>a</sup>Initiation defined as a new MOUD treatment episode following 30 days with no MOUD. All office- and facility-based MOUD administrations were classified as in-person initiations. Telehealth vs. outpatient initiation for prescription fills was determined by identifying outpatient visits within 7 days before to 3 days after the prescription fill with either a matching prescriber ID for the prescription and provider ID for the visit or with an opioid use disorder diagnosis at the visit and then applying state-specific definitions for telehealth. MOUD prescription fills with no outpatient visits within 7 days before to 3 days after the prescription fill meeting these criteria were unclassified.

<sup>b</sup>Non-dual full benefit Medicaid enrollees ages 18-64 years in Kentucky, Maine, Maryland, Michigan, North Carolina, Ohio, Pennsylvania, Virginia, West Virginia, Wisconsin

**eFigure 15.** Monthly Rates of Any Medication for Opioid Use Disorder (MOUD) per 100,000 Medicaid Enrollees by Living Area<sup>a</sup>

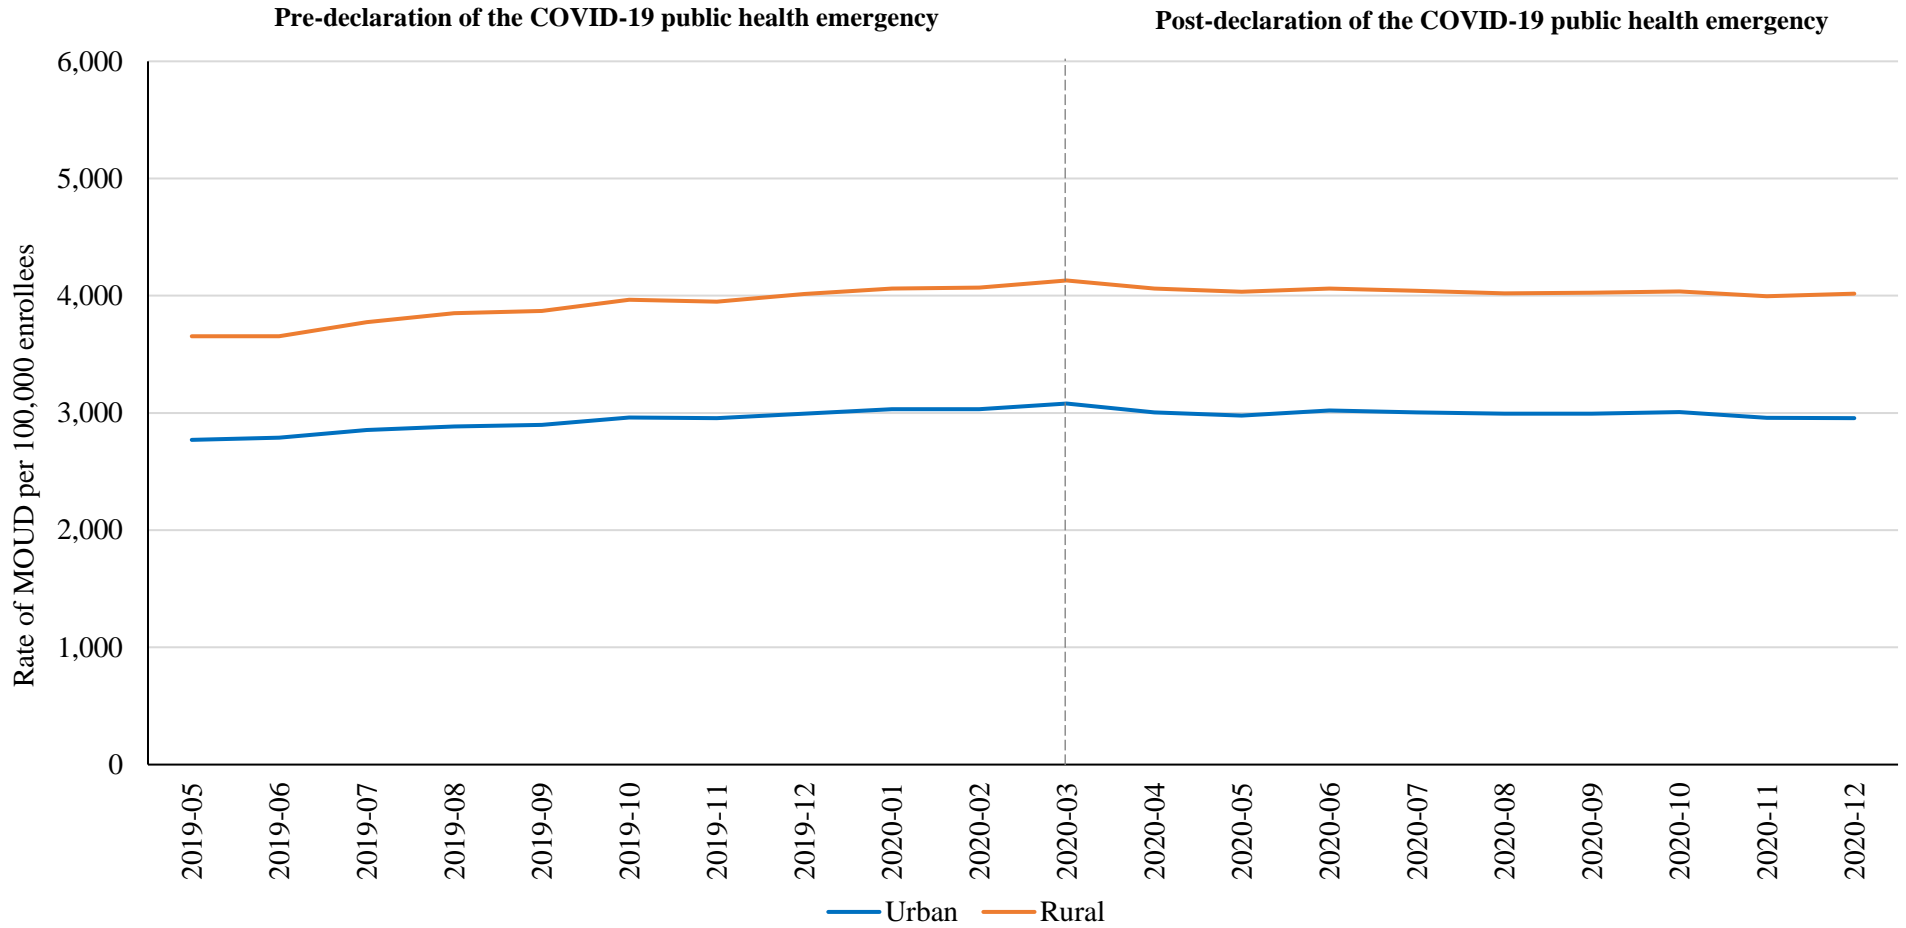

<sup>a</sup>Non-dual full benefit Medicaid enrollees ages 18-64 years in Kentucky, Maine, Maryland, Michigan, North Carolina, Ohio, Pennsylvania, Virginia, West Virginia, Wisconsin

**eFigure 16.** Monthly Rates of Outpatient Initiation<sup>a</sup> of Medication for Opioid Use Disorder (MOUD) per 100,000 Medicaid Enrollees by Living Area<sup>b</sup>

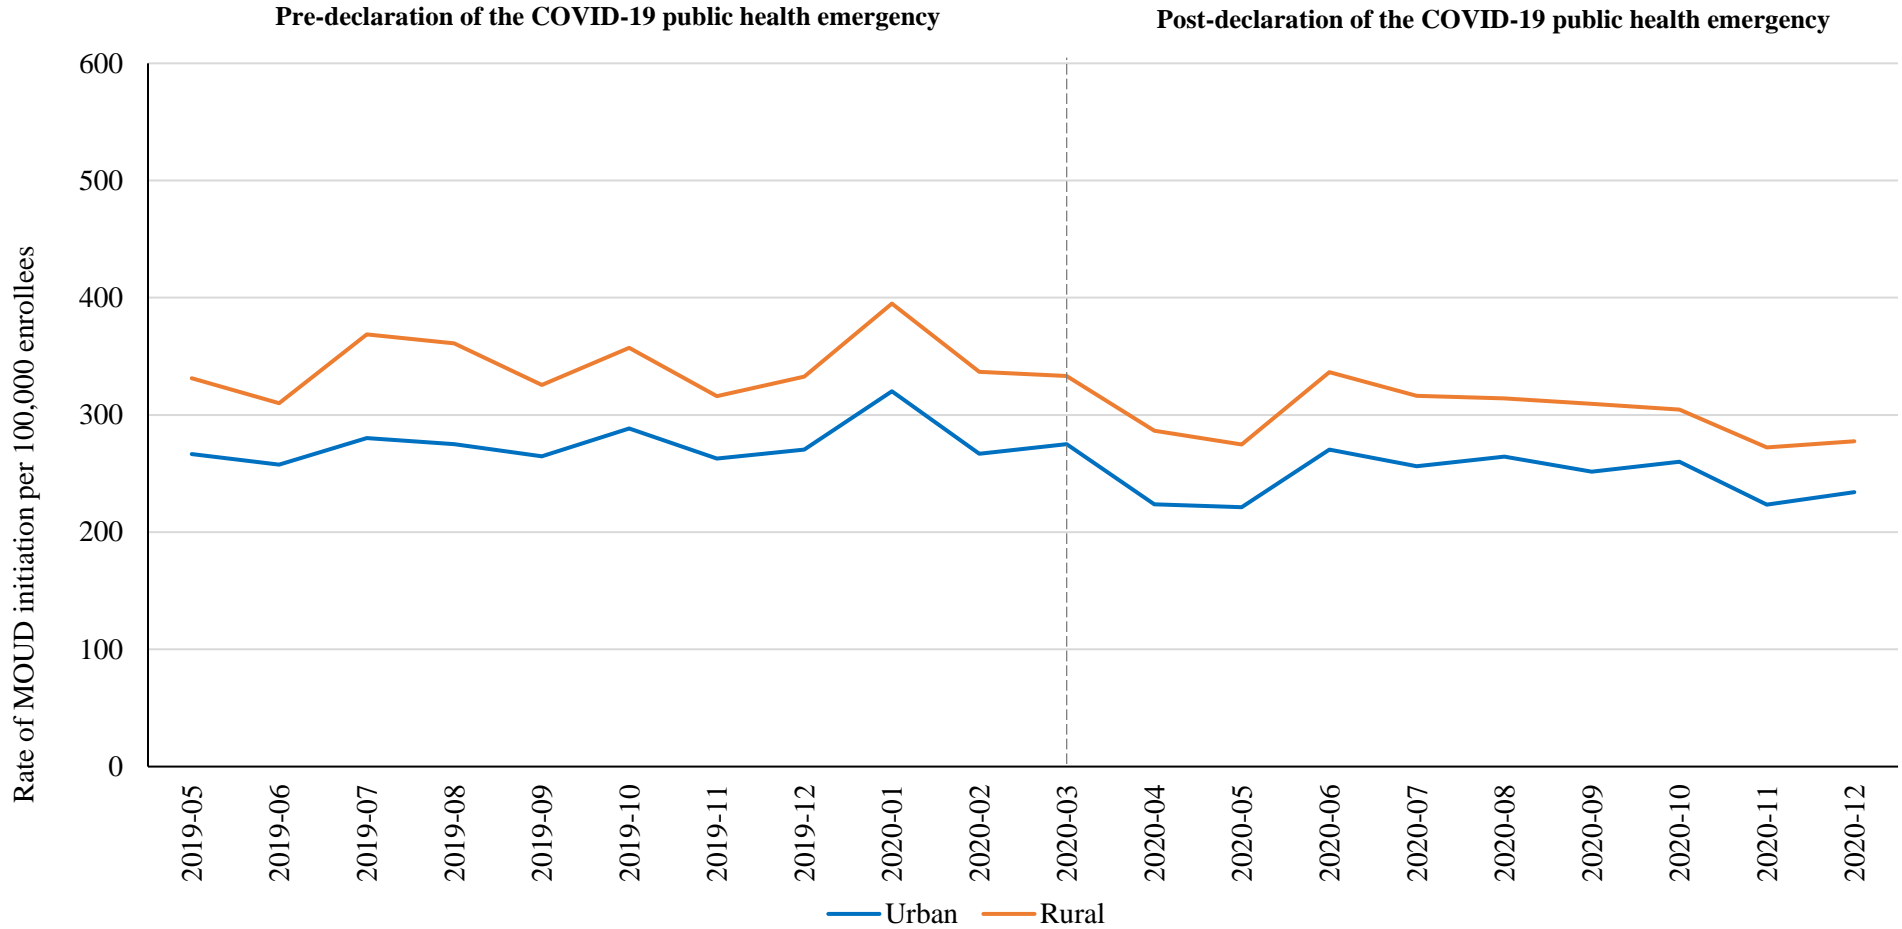

<sup>a</sup>Initiation defined as a new MOUD treatment episode following 30 days with no MOUD. All office- and facility-based MOUD administrations were classified as in-person initiations. Telehealth vs. outpatient initiation for prescription fills was determined by identifying outpatient visits within 7 days before to 3 days after the prescription fill with either a matching prescriber ID for the prescription and provider ID for the visit or with an opioid use disorder diagnosis at the visit and then applying state-specific definitions for telehealth. MOUD prescription fills with no outpatient visits within 7 days before to 3 days after the prescription fill meeting these criteria were unclassified.

<sup>b</sup>Non-dual full benefit Medicaid enrollees ages 18-64 years in Kentucky, Maine, Maryland, Michigan, North Carolina, Ohio, Pennsylvania, Virginia, West Virginia, Wisconsin

**eTable 3.** State-Specific Interrupted Time Series Results<sup>a</sup> for Change in the Likelihood of Any Medication for Opioid Use Disorder (MOUD) After the COVID-19 Public Health Emergency Was Declared (Post-PHE) Compared With Before the Public Health Emergency Was Declared (Pre-PHE)<sup>b</sup> Among Medicaid Enrollees in 10 States<sup>c</sup>

| State | Time trend |              | Immediate change after vs before the PHE |              | Trend change after vs before the PHE |              |
|-------|------------|--------------|------------------------------------------|--------------|--------------------------------------|--------------|
|       | OR         | 95% CI       | OR                                       | 95% CI       | OR                                   | 95% CI       |
| A     | 1.02       | (1.02,1.02)  | 1.01                                     | (1.00, 1.01) | 1.00                                 | (1.00, 1.00) |
| B     | 0.99       | (0.99,1.00)  | 1.00                                     | (1.00, 1.01) | 1.01                                 | (1.01, 1.01) |
| C     | 1.01       | (1.01, 1.01) | 1.00                                     | (1.00, 1.01) | 1.00                                 | (1.00, 1.00) |
| D     | 1.00       | (1.00, 1.00) | 1.01                                     | (1.00, 1.01) | 1.01                                 | (1.01, 1.01) |
| E     | 1.00       | (1.00, 1.01) | 1.01                                     | (1.00, 1.01) | 1.00                                 | (1.00, 1.00) |
| F     | 1.00       | (1.00, 1.00) | 1.02                                     | (1.02,1.03)  | 1.00                                 | (1.00, 1.00) |
| G     | 1.03       | (1.03,1.03)  | 1.01                                     | (1.00, 1.02) | 0.99                                 | (0.99,0.99)  |
| H     | 1.00       | (1.00, 1.01) | 1.00                                     | (0.99,1.01)  | 1.00                                 | (1.00, 1.00) |
| I     | 1.01       | (1.01, 1.01) | 1.00                                     | (0.99,1.01)  | 1.01                                 | (1.00, 1.01) |
| L     | 1.01       | (1.00, 1.01) | 1.01                                     | (1.00, 1.02) | 1.00                                 | (0.99, 1.00) |

OR=odds ratio; CI=confidence interval

<sup>a</sup>Adjusted for sex, race/ethnicity, age group, area of residence, Medicaid eligibility group, and number of months enrolled in Medicaid during the study period

<sup>b</sup>Post-PHE period is March-December 2020. Pre-PHE period is May 2019-February 2020.

<sup>c</sup>Non-dual full benefit Medicaid enrollees ages 18-64 years in Kentucky, Maine, Maryland, Michigan, North Carolina, Ohio, Pennsylvania, Virginia, West Virginia, Wisconsin

**eTable 4.** State-Specific Interrupted Time Series Results<sup>a</sup> for Change in the Likelihood of Outpatient Initiation of Medication for Opioid Use Disorder (MOUD) After the COVID-19 Public Health Emergency Was Declared (Post-PHE) Compared With Before the Public Health Emergency Was Declared (Pre-PHE)<sup>b</sup> Among Medicaid Enrollees in 10 States<sup>c</sup>

| State | Time trend |             | Immediate change after vs before the PHE |             | Trend change after vs before the PHE |             |
|-------|------------|-------------|------------------------------------------|-------------|--------------------------------------|-------------|
|       | OR         | 95% CI      | OR                                       | 95% CI      | OR                                   | 95% CI      |
| A     | 1.02       | (1.02,1.03) | 0.89                                     | (0.86,0.91) | 0.97                                 | (0.96,0.97) |
| B     | 1.01       | (1.00,1.01) | 0.91                                     | (0.88,0.95) | 1.00                                 | (0.99,1.00) |
| C     | 1.01       | (1.01,1.02) | 0.75                                     | (0.72,0.78) | 0.99                                 | (0.98,1.00) |
| D     | 1.00       | (0.99,1.01) | 1.05                                     | (0.99,1.11) | 0.99                                 | (0.98,1.00) |
| E     | 1.00       | (1.00,1.01) | 0.93                                     | (0.90,0.95) | 0.99                                 | (0.99,1.00) |
| F     | 1.00       | (1.00,1.00) | 0.92                                     | (0.89,0.94) | 0.99                                 | (0.99,1.00) |
| G     | 1.00       | (1.00,1.01) | 0.86                                     | (0.82,0.89) | 0.99                                 | (0.99,1.00) |
| H     | 1.00       | (0.99,1.00) | 0.97                                     | (0.92,1.03) | 0.98                                 | (0.97,0.99) |
| I     | 1.01       | (1.00,1.02) | 0.91                                     | (0.87,0.96) | 1.00                                 | (0.99,1.01) |
| L     | 0.99       | (0.98,1.01) | 0.89                                     | (0.81,0.98) | 0.97                                 | (0.95,0.99) |

OR=odds ratio; CI=confidence interval

<sup>a</sup>Adjusted for sex, race/ethnicity, age group, area of residence, Medicaid eligibility group, and number of months enrolled in Medicaid during the study period

<sup>b</sup>Post-PHE period is March-December 2020. Pre-PHE period is May 2019-February 2020.

<sup>c</sup>Non-dual full benefit Medicaid enrollees ages 18-64 years in Kentucky, Maine, Maryland, Michigan, North Carolina, Ohio, Pennsylvania, Virginia, West Virginia, Wisconsin

**eTable 5. MODRN Collaborators**

Delaware: Elizabeth Brown, MD, MSHP, Dara Hall, MSN, RNC-NIC (Delaware Division of Medicaid and Medical Assistance)

Kentucky: Katherine Marks, PhD (Kentucky Department for Behavioral Health, Developmental and Intellectual Disabilities), Angela Taylor, BS (University of Kentucky and Kentucky Office of Health Data Analytics)

Maine: Catherine McGuire, BS (University of Southern Maine), David Jorgenson, MS (Maine Department of Health and Human Services)

Maryland: Alyssa Brown, JD (Maryland Department of Health), Alice Middleton, JD, Cynthia Woodcock, MBA, David Idala, MA (The Hilltop Institute, UMBC)

Michigan: Lisa Cohn, MS (University of Michigan, Department of Pediatrics), Marie LaPres, RN, JD (Michigan Medicaid)

North Carolina: Emma Sandoe, PhD, Shannon Dowler, MD, Lauryn Walker, PhD, RN, MPH (North Carolina Department of Health and Human Services)

Ohio: Mary Applegate, MD, FAAP, FACP, Kendalyn Markman, Mark Rizzutti, MPH, MHSA, Elizabeth Truex-Powell, PhD (Ohio Department of Medicaid), Aimee Mack, MPH, Robert Ashmead, PhD, Emelie Bailey, MA (Ohio Colleges of Medicine Government Resource Center, Ohio State University Wexner Medical Center)

Pennsylvania: David Kelley, MD, Andrea Race, (Pennsylvania Department of Human Services), A. Everette James, JD, MBA, Monica Costlow, JD (University of Pittsburgh)

Virginia: Ashley Harrell, LCSW, Neil McCray, PhD, Chethan Bachireddy, MD, MSc ( (Virginia Department of Medical Assistance Services)

West Virginia: Cynthia Parsons, MA, James Becker, MD (Bureau for Medical Services at the West Virginia Department for Health and Human Resources), Yilin Cai, MS, MBA (West Virginia University)

Wisconsin: Kristen Voskuil, MA (University of Wisconsin), Pam Appleby (Wisconsin Department of Health Services)
