# Supplementary material for: Trends in Use of Medication to Treat Opioid Use Disorder During the COVID-19 Pandemic in 10 State Medicaid Programs
Source: PubMed Central journal article supplement (PMC10276306; doi:10.1001/jamahealthforum.2023.1422), 2023-06-16
Supplement: jamahealthforum-e231422-s002.pdf [file jamahealthforum-e231422-s002.pdf]

## Data Sharing Statement

Austin. Trends in Use of Medication to Treat Opioid Use Disorder During the COVID-19 Pandemic in 10 State Medicaid Programs. *JAMA Health Forum*. Published June 16, 2023. doi:10.1001/jamahealthforum.2023.1422

### Data

**Data available:** No

### Additional Information

**Explanation for why data not available:** Medicaid claims and enrollment data were available to University partners by their state Medicaid agency through data use agreements.
